# Supplementary material
Source: publisher site journal article supplement (https://www.dovepress.com/article/423884)
Supplement: Supplementary file 1 [file get_supplementary_file.php]

Supplementary Online Contents

Table S1. Reporting checklist for systematic review (with a meta-analysis).

Table S2. Search Terms and Number of Records

Table S3. Main baseline characteristics of the studies conducted on diet and asthma/wheeze included in the meta-analysis.

Table S4. Main statistical value of the studies conducted on diet and asthma/wheeze included in the meta-analysis.

Table S5. AHRQ for assessing the quality of all cross-sectional studies involved in this meta-analysis.

Table S6. The Newcastle-Ottawa Scale (NOS) for assessing the quality of all cohort studies involved in this meta-analysis.

Figure S1 Overall analysis of different types of diet pattern and childhood asthma/wheeze risk in cross-sectional studies with odds ratio (OR) and 95% confidence interval (CI).

# Table S1. Reporting checklist for systematic review (with or without a meta-analysis).

Based on the PRISMA guidelines.

## Instructions to authors

Complete this checklist by entering the page numbers from your manuscript where readers will find each of the items listed below.

Your article may not currently address all the items on the checklist. Please modify your text to include the missing information. If you are certain that an item does not apply, please write "n/a" and provide a short explanation.

Upload your completed checklist as an extra file when you submit to a journal.

In your methods section, say that you used the PRISMAreporting guidelines, and cite them as:

Page MJ, McKenzie JE, Bossuyt PM, Boutron I, Hoffmann TC, Mulrow CD, Shamseer L, Tetzlaff JM, Akl EA, Brennan SE, Chou R, Glanville J, Grimshaw JM, Hróbjartsson A, Lalu MM, Li T, Loder EW, Mayo-Wilson E, McDonald S, McGuinness LA, Stewart LA, Thomas J, Tricco AC, Welch VA, Whiting P, Moher D. The PRISMA 2020 statement: An updated guideline for reporting systematic reviews

|  |  | Reporting Item | Page Number |
| --- | --- | --- | --- |
| **Title** |  |  |  |
| Title | [#1](https://www.goodreports.org/reporting-checklists/prisma/info/#1) | Identify the report as a systematic review | 1 |
| **Abstract** |  |  |  |
| Abstract | [#2](https://www.goodreports.org/reporting-checklists/prisma/info/#2) | Report an abstract addressing each item in the PRISMA 2020 for Abstracts checklist | 2-3 |
| **Introduction** |  |  |  |
| Background/rationale | [#3](https://www.goodreports.org/reporting-checklists/prisma/info/#3) | Describe the rationale for the review in the context of existing knowledge | 4-6 |
| Objectives | [#4](https://www.goodreports.org/reporting-checklists/prisma/info/#4) | Provide an explicit statement of the objective(s) or question(s) the review addresses | 5-6 |
| **Methods** |  |  |  |
| Eligibility criteria | [#5](https://www.goodreports.org/reporting-checklists/prisma/info/#5) | Specify the inclusion and exclusion criteria for the review and how studies were grouped for the syntheses | 6-7 |
| Information sources | [#6](https://www.goodreports.org/reporting-checklists/prisma/info/#6) | Specify all databases, registers, websites, organisations, reference lists, and other sources searched or consulted to identify studies. Specify the date when each source was last searched or consulted | 6 |
| Search strategy | [#7](https://www.goodreports.org/reporting-checklists/prisma/info/#7) | Present the full search strategies for all databases, registers, and websites, including any filters and limits used | 6, eTable3 |
| Selection process | [#8](https://www.goodreports.org/reporting-checklists/prisma/info/#8) | Specify the methods used to decide whether a study met the inclusion criteria of the review, including how many reviewers screened each record and each report retrieved, whether they worked independently, and, if applicable, details of automation tools used in the process | 7 |
| Data collection process | [#9](https://www.goodreports.org/reporting-checklists/prisma/info/#9) | Specify the methods used to collect data from reports, including how many reviewers collected data from each report, whether they worked independently, any processes for obtaining or confirming data from study investigators, and, if applicable, details of automation tools used in the process | 7 |
| Data items | [#10a](https://www.goodreports.org/reporting-checklists/prisma/info/#10a) | List and define all outcomes for which data were sought. Specify whether all results that were compatible with each outcome domain in each study were sought (for example, for all measures, time points, analyses), and, if not, the methods used to decide which results to collect | 7 |
| Data items | [#10b](https://www.goodreports.org/reporting-checklists/prisma/info/#10b) | List and define all other variables for which data were sought (such as participant and intervention characteristics, funding sources). Describe any assumptions made about any missing or unclear information | eTable4 |
| Study risk of bias assessment | [#11](https://www.goodreports.org/reporting-checklists/prisma/info/#11) | Specify the methods used to assess risk of bias in the included studies, including details of the tool(s) used, how many reviewers assessed each study and whether they worked independently, and, if applicable, details of automation tools used in the process | 8-9 |
| Effect measures | [#12](https://www.goodreports.org/reporting-checklists/prisma/info/#12) | Specify for each outcome the effect measure(s) (such as risk ratio, mean difference) used in the synthesis or presentation of results | 8-9 |
| Synthesis methods | [#13a](https://www.goodreports.org/reporting-checklists/prisma/info/#13a) | Describe the processes used to decide which studies were eligible for each synthesis (such as tabulating the study intervention characteristics and comparing against the planned groups for each synthesis (item #5)) | 8-9 |
| Synthesis methods | [#13b](https://www.goodreports.org/reporting-checklists/prisma/info/#13b) | Describe any methods required to prepare the data for presentation or synthesis, such as handling of missing summary statistics or data conversions | 8-9 |
| Synthesis methods | [#13c](https://www.goodreports.org/reporting-checklists/prisma/info/#13c) | Describe any methods used to tabulate or visually display results of individual studies and syntheses | 8-9 |
| Synthesis methods | [#13d](https://www.goodreports.org/reporting-checklists/prisma/info/#13d) | Describe any methods used to synthesise results and provide a rationale for the choice(s). If meta-analysis was performed, describe the model(s), method(s) to identify the presence and extent of statistical heterogeneity, and software package(s) used | 8-9 |
| Synthesis methods | [#13e](https://www.goodreports.org/reporting-checklists/prisma/info/#13e) | Describe any methods used to explore possible causes of heterogeneity among study results (such as subgroup analysis, meta-regression) | 9 |
| Synthesis methods | [#13f](https://www.goodreports.org/reporting-checklists/prisma/info/#13f) | Describe any sensitivity analyses conducted to assess robustness of the synthesised results | 9 |
| Reporting bias assessment | [#14](https://www.goodreports.org/reporting-checklists/prisma/info/#14) | Describe any methods used to assess risk of bias due to missing results in a synthesis (arising from reporting biases) | 9 |
| Certainty assessment | [#15](https://www.goodreports.org/reporting-checklists/prisma/info/#15) | Describe any methods used to assess certainty (or confidence) in the body of evidence for an outcome | 9 |
| **Results** |  |  |  |
| Study selection | [#16a](https://www.goodreports.org/reporting-checklists/prisma/info/#16a) | Describe the results of the search and selection process, from the number of records identified in the search to the number of studies included in the review, ideally using a flow diagram (http://www.prisma-statement.org/PRISMAStatement/FlowDiagram) | Figure1 |
| Study selection | [#16b](https://www.goodreports.org/reporting-checklists/prisma/info/#16b) | Cite studies that might appear to meet the inclusion criteria, but which were excluded, and explain why they were excluded | Figure1 |
| Study characteristics | [#17](https://www.goodreports.org/reporting-checklists/prisma/info/#17) | Cite each included study and present its characteristics | 10-11 |
| Risk of bias in studies | [#18](https://www.goodreports.org/reporting-checklists/prisma/info/#18) | Present assessments of risk of bias for each included study | 11 |
| Results of individual studies | [#19](https://www.goodreports.org/reporting-checklists/prisma/info/#19) | For all outcomes, present for each study (a) summary statistics for each group (where appropriate) and (b) an effect estimate and its precision (such as confidence/credible interval), ideally using structured tables or plots | Table 1 |
| Results of syntheses | [#20a](https://www.goodreports.org/reporting-checklists/prisma/info/#20a) | For each synthesis, briefly summarise the characteristics and risk of bias among contributing studies | 11-12, Table 1 |
| Results of syntheses | [#20b](https://www.goodreports.org/reporting-checklists/prisma/info/#20b) | Present results of all statistical syntheses conducted. If meta-analysis was done, present for each the summary estimate and its precision (such as confidence/credible interval) and measures of statistical heterogeneity. If comparing groups, describe the direction of the effect | 11-12, Table 1 |
| Results of syntheses | [#20c](https://www.goodreports.org/reporting-checklists/prisma/info/#20c) | Present results of all investigations of possible causes of heterogeneity among study results | 11-15 |
| Results of syntheses | [#20d](https://www.goodreports.org/reporting-checklists/prisma/info/#20d) | Present results of all sensitivity analyses conducted to assess the robustness of the synthesised results | 13 |
| Risk of reporting biases in syntheses | [#21](https://www.goodreports.org/reporting-checklists/prisma/info/#21) | Present assessments of risk of bias due to missing results (arising from reporting biases) for each synthesis assessed | 13 |
| Certainty of evidence | [#22](https://www.goodreports.org/reporting-checklists/prisma/info/#22) | Present assessments of certainty (or confidence) in the body of evidence for each outcome assessed | 11-15 |
| **Discussion** |  |  |  |
| Results in context | [#23a](https://www.goodreports.org/reporting-checklists/prisma/info/#23a) | Provide a general interpretation of the results in the context of other evidence | 16-19 |
| Limitations of included studies | [#23b](https://www.goodreports.org/reporting-checklists/prisma/info/#23b) | Discuss any limitations of the evidence included in the review | 18-19 |
| Limitations of the review methods | [#23c](https://www.goodreports.org/reporting-checklists/prisma/info/#23c) | Discuss any limitations of the review processes used | 19 |
| Implications | [#23d](https://www.goodreports.org/reporting-checklists/prisma/info/#23d) | Discuss implications of the results for practice, policy, and future research | 19-20 |
| **Other information** |  |  |  |
| Registration and protocol | [#24a](https://www.goodreports.org/reporting-checklists/prisma/info/#24a) | Provide registration information for the review, including register name and registration number, or state that the review was not registered | 6 |
| Registration and protocol | [#24b](https://www.goodreports.org/reporting-checklists/prisma/info/#24b) | Indicate where the review protocol can be accessed, or state that a protocol was not prepared | 6 |
| Registration and protocol | [#24c](https://www.goodreports.org/reporting-checklists/prisma/info/#24c) | Describe and explain any amendments to information provided at registration or in the protocol | NA |
| Support | [#25](https://www.goodreports.org/reporting-checklists/prisma/info/#25) | Describe sources of financial or non-financial support for the review, and the role of the funders or sponsors in the review | 20 |
| Competing interests | [#26](https://www.goodreports.org/reporting-checklists/prisma/info/#26) | Declare any competing interests of review authors | 20 |
| Availability of data, code, and other materials | [#27](https://www.goodreports.org/reporting-checklists/prisma/info/#27) | Report which of the following are publicly available and where they can be found: template data collection forms; data extracted from included studies; data used for all analyses; analytic code; any other materials used in the review | 21 |

None The PRISMA checklist is distributed under the terms of the Creative Commons Attribution License CC-BY. This checklist can be completed online using <https://www.goodreports.org/>, a tool made by the [EQUATOR Network](https://www.equator-network.org) in collaboration with Penelope

**Table S2. Search Terms and Number of Records**

| **Search Terms and Number of Records** |
| --- |
| **PubMed** (N= 4626) |
| (asthma OR wheeze OR asthma like symptoms OR atopic disease OR atopy OR airway hyperresponsiveness OR lung function) [Title] AND (diet OR dietary OR food pattern OR dietary intake OR nutrition OR food OR Mediterranean OR cereals OR dairy OR "fast food" OR "junk food" OR fish OR fruit OR legumes OR pulses OR meat OR nuts OR seeds OR soy OR starch OR potatoes OR rice OR vegetables OR plant-based diets OR traditional diet OR vegetarian diet OR vegan OR plant-based diet OR meatless diet OR lacto-vegetarian OR lactovegetarian OR ovo-vegetarian OR lacto-ovo-vegetarian OR pesco-vegetarian OR semi-vegetarian) [Title/Abstract] |
| **Web of Science** (N= 659) |
| TS= ( asthma OR wheeze OR “asthma like symptoms” OR “atopic disease” OR atopy OR “airway hyperresponsiveness” OR “lung function”) AND TS= (diet OR dietary OR “food pattern” OR “dietary intake” OR nutrition OR food OR Mediterranean OR cereals OR dairy OR “fast food” OR “junk food” OR fish OR fruit OR legumes OR pulses OR meat OR nuts OR seeds OR soy OR starch OR potatoes OR rice OR vegetables OR “plant-based diets” OR “traditional diet” OR “vegetarian diet” OR vegan OR “plant-based diet” OR “meatless diet” OR “lacto-vegetarian” OR lactovegetarian OR ovo-vegetarian OR lacto-ovo-vegetarian OR pesco-vegetarian OR semi-vegetarian) |
| **EMBASE** (N=676) |
| (asthma :ti OR wheeze :ti OR 'asthma like symptoms':ti OR 'atopic disease':ti OR atopy :ti OR 'airway hyperresponsiveness':ti OR 'lung function':ti AND ( diet :ab,ti OR dietary :ti OR 'food pattern':ab,ti OR 'dietary intake':ab,ti OR nutrition :ab,ti OR food:ab,ti OR Mediterranean :ab,ti OR cereals :ab,ti OR dairy :ab,ti OR 'fast food ':ab,ti OR 'junk food':ab,ti OR fish :ab,ti OR fruit:ab,ti OR legumes:ab,ti OR pulses :ab,ti OR meat :ab,ti OR nuts :ab,ti OR seeds:ab,ti OR soy:ab,ti OR starch:ab,ti OR potatoes :ab,ti OR rice :ab,ti vegetables :ab,ti OR 'plant-based diets':ab,ti OR 'traditional diet' :ab,ti OR 'vegetarian diet ':ab,ti OR vegan :ab,ti OR 'plant-based diet':ab,ti OR 'meatless diet' :ab,ti OR lacto-vegetarian :ab,ti OR lactovegetarian :ab,ti OR ovo-vegetarian :ab,ti OR lacto-ovo-vegetarian :ab,ti OR pesco-vegetarian :ab,ti OR semi-vegetarian :ab,ti ) |
| **Scopus** (N= 2436) |
| ( TITLE ( asthma ) OR TITLE ( wheeze ) OR TITLE ( "atopic disease" ) OR TITLE ( atopy ) OR TITLE ( "airway hyperresponsiveness" ) AND TITLE ( dietary ) OR TITLE-ABS-KEY ( "food pattern" ) OR TITLE-ABS-KEY ( "dietary intake" ) OR TITLE-ABS-KEY ( nutrition ) OR TITLE-ABS-KEY ( mediterranean ) OR TITLE-ABS-KEY ( cereals ) OR TITLE-ABS-KEY ( dairy ) OR TITLE-ABS-KEY ( "fast food" ) OR TITLE-ABS-KEY ( "junk food" ) OR TITLE-ABS-KEY ( fish ) OR TITLE-ABS-KEY ( fruit ) OR TITLE-ABS-KEY ( legumes ) OR TITLE-ABS-KEY ( meat ) OR TITLE-ABS-KEY ( nuts ) OR TITLE-ABS-KEY ( seeds ) OR TITLE-ABS-KEY ( soy ) OR TITLE-ABS-KEY ( starch ) OR TITLE-ABS-KEY ( potatoes ) OR TITLE-ABS-KEY ( vegetables ) OR TITLE-ABS-KEY ( "plant-based diet" ) OR TITLE-ABS-KEY ( "traditional diet" ) OR TITLE-ABS-KEY ( lactovegetarian ) OR TITLE-ABS-KEY ( pesco-vegetarian ) ) |

**Table S3. Main baseline characteristics of the studies conducted on diet and asthma/wheeze included in the meta-analysis.**

| **NO.** | **year** | **First author** | **country** | **age** | **gender** | **Study design** | **Sample size** | **boys** | **girls** | **Follow up years** | **Ascertainment of diet** | **Ascertainment of asthma** |
| --- | --- | --- | --- | --- | --- | --- | --- | --- | --- | --- | --- | --- |
| 1 | 1996 | Carey | UK | 8-11 | both | cross-section | 847 | 417 | 430 | NA | questionnaire | questionnaire |
| 2 | 1996 | Hodge | Australia | 8-11 | both | cross-section | 468 | 252 | 216 | NA | FFQ | Respiratory questionnaire |
| 3 | 2000 | Forastiere | Italty | 6-7 | both | cross-section | 18737 | 9668 | 9069 | NA | questionnaire | ISAAC questionnaire |
| 4 | 2000 | Hijazi | Saudi Arabia | 12 | both | cross-section | 316 | NA | NA | NA | semi-quantitative FFQ adapted for the Arabic diet | ISAAC questionnaire |
| 5 | 2001 | Huang | China | 13-17 | both | cross-section | 1166 | 582 | 584 | NA | FFQ | physician-diagnosed |
| 6 | 2002 | Takemura | Japan | 6-15 | both | cross-section | 23782 | 11993 | 11789 | NA | FFQ | ATS-DLD questionnaire |
| 7 | 2003 | Nafstad | Norway | 4 | both | cohort | 2531 | NA | NA | 4 | questionnaire | physician-diagnosed |
| 8 | 2003 | Wijga | Netherlands | 3 | both | cohort | 2978 | 1539 | 1439 | 1 | questionnaire | ISAAC questionnaire |
| 9 | 2004 | Demir | Turkey | 6-14 | both | cross-section | 1064 | 523 | 541 | NA | questionnaire | questionnaire |
| 10 | 2004 | Wong | China | 10 | both | cross-section | 10902 | 5587 | 5315 | NA | questionnaire | questionnaire |
| 11 | 2005 | Kim | Sweden | 6-13 | both | cross-section | 1014 | 492 | 522 | NA | questionnaire | ECRHS and physician-diagnosed |
| 12 | 2005 | Lewis | UK | 4-6 | both | cross-section | 11546 | 5835 | 5711 | NA | questionnaire | International Study of Asthma and Allergies in Childhood |
| 13 | 2005 | Njå | Norway | 6-16 | both | cross-section | 4585 | NA | NA | NA | questionnaire | questionnaire |
| 14 | 2005 | Wickens | New Zealand | 10.1-12.5 | both | cross-section | 1321 | 665 | 656 | NA | FFQ | ISAAC questionnaire |
| 15 | 2006 | Hong | Korean | 6-12 | both | cross-section | 24260 | NA | NA | NA | questionnaire | physician-diagnosed |
| 16 | 2006 | Pastorino | Brazil | 13-14 | both | cross-section | 3181 | NA | NA | NA | questionnaire | ISAAC questionnaire |
| 17 | 2006 | Tabak | Dutch | 8-13 | both | cross-section | 598 | NA | NA | NA | FFQ | ISAAC questionnaire |
| 18 | 2007 | Chatzi | Spain | 6.5 | both | cross-section | 460 | 232 | 228 | NA | FFQ | questionnaire |
| 19 | 2007 | Garcia-Marcos | Spain | 6-7 | both | cross-section | 20106 | NA | NA | NA | environmental questionnaire | questionnaire |
| 20 | 2007 | Okoko | UK | 5-10 | both | cross-section | 2640 | 1235 | 1325 | NA | fruit frequency questionnaire | questionnaire |
| 21 | 2007 | Tsai | China | 10 | both | cross-section | 2290 | 1146 | 1072 | NA | questionnaire | the screening instruments of the American Thoracic Society |
| 22 | 2007 | Waser | multi-center | 5-13 | both | cross-section | 14893 | NA | NA | NA | PARSIFAL questionnaire | ISAAC questionnaire |
| 23 | 2008 | Corbo | Italty | 6-7 | both | cross-section | 20016 | 10208 | 9808 | NA | questionnaire | ISAAC questionnaire |
| 24 | 2008 | de Batlle | Mexico | 6-7 | both | cross-section | 1476 | NA | NA | NA | FFQ | ISAAC questionnaire |
| 25 | 2008 | Foliaki | multi-center | NA | both | cross-section | 17684 | NA | NA | NA | questionnaire | ISAAC questionnaire |
| 26 | 2008 | Garcia | Colombia | 6-7 | both | cross-section | 3256 | 1426 | 1830 | NA | written questionnaire | ISAAC questionnaire |
| 27 | 2009 | Gutiérrez-Delgado | Mexico | 6-14 | both | cross-section | 4970 | NA | NA | NA | questionnaire | ISAAC questionnaire |
| 28 | 2009 | Mai | Canada | 8-10 | both | cross-section | 723 | 398 | 317 | NA | questionnaire | physician-diagnosed |
| 29 | 2010 | Gonzalez Barcala | Spain | 6-7 | boys | cross-section | 7354 | 3732 | 3622 | NA | MDS | ISAAC questionnaire |
| 30 | 2010 | Rodríguez-Rodríguez | Spain | 8-13 | both | cross-section | 638 | 338 | 300 | NA | questionnaire | questionnaire |
| 31 | 2011 | Arvaniti | Athens | 10-12 | both | cross-section | 700 | 323 | 377 | NA | MDS | ISAAC questionnaire |
| 32 | 2011 | Goksör | Sweden | 4.5 | both | cohort | 4496 | NA | NA | 4 | questionnaire | ISAAC questionnaire |
| 33 | 2011 | Willers | Netherlands | 2-3 | both | cohort | 3963 | 2052 | 1911 | 6 | questionnaire | ISAAC questionnaire |
| 34 | 2012 | Kiefte-de Jong | Netherlands | 1 | both | cohort | 7210 | 3647 | 3563 | 2 | FFQ | ISAAC questionnaire |
| 35 | 2013 | Goksör | Sweden | 8 | both | cohort | 4051 | NA | NA | 7 | questionnaire | ISAAC questionnaire |
| 36 | 2013 | Lawson | Canada | 6-18 | both | cross-section | 295 | 139 | 156 | NA | questionnaire | questionnaire |
| 37 | 2014 | Akcay | Turkey | 13-14 | both | cross-section | 9991 | 4746 | 5166 | NA | questionnaire | ISAAC questionnaire |
| 38 | 2014 | D'Innocenzo | Brazil | 4-11 | both | cross-section | 1168 | NA | NA | NA | FFQ | ISAAC questionnaire |
| 39 | 2014 | Patel | UK | 8 | both | cross-section | 753 | 416 | 337 | NA | FFQ | physician-diagnosed |
| 40 | 2015 | Cepeda | Colombia | 6-7 | both | cross-section | 3209 | 1521 | 1688 | NA | questionnaire | ISAAC questionnaire |
| 41 | 2015 | Gomes de Luna Mde | Brazil | 13-14 | both | cross-section | 3015 | 1643 | 1372 | NA | questionnaire | ISAAC questionnaire |
| 42 | 2015 | Han | USA | 6-14 | both | cross-section | 678 | 360 | 318 | NA | FFQ | physician-diagnosed |
| 43 | 2015 | Lumia | Finland | 1-5 | both | cohort | 805 | 492 | 313 | 6 | FFQ | physician-diagnosed |
| 44 | 2015 | Papadopoulou | Greece | 9-10 | both | cross-section | 2023 | 969 | 1054 | NA | semi-quantitative FFQ | ISAAC questionnaire |
| 45 | 2015 | Rice | Peru | 9-19 | both | cross-section | 383 | 286 | 97 | NA | MDS | ISAAC questionnaire |
| 46 | 2015 | Saadeh | French | 9-11 | both | cross-section | 7432 | 3671 | 3761 | NA | FFQ | ISAAC questionnaire |
| 47 | 2016 | Alqahtani | Saudi Arabia | 7-19 | both | cross-section | 1700 | 851 | 849 | NA | questionnaire | ISAAC questionnaire |
| 48 | 2016 | Feng | China | 13-14 | both | cross-section | 12779 | 6938 | 5841 | NA | questionnaire | ISAAC questionnaire |
| 49 | 2016 | Mascarenhas | Brazil | 11-17 | both | cross-section | 1176 | 499 | 677 | NA | FFQ | ISAAC questionnaire |
| 50 | 2017 | Hallit | lebanon | 3-16 | both | cross-section | 1276 | 662 | 612 | NA | FFQ | ISAAC questionnaire |
| 51 | 2018 | Kang | Korean | 12-18 | both | cross-section | NA | NA | NA | NA | FFQ | questionnaire |
| 52 | 2018 | Melo | Brazil | <18 | both | cross-section | 109104 | 52152 | 56952 | NA | FFQ | ISAAC questionnaire |
| 53 | 2019 | Elias | Brazil | 12-17 | both | cross-section | 108350 | 51792 | 56558 | NA | questionnaire | ISAAC questionnaire |
| 54 | 2019 | Malaeb | lebanon | 6-14 | both | cross-section | 1000 | 496 | 504 | NA | FFQ | ISAAC questionnaire |
| 55 | 2019 | Øien | Norway | 6 | both | cohort | 4262 | 2131 | 2131 | 6 | FFQ | ISAAC questionnaire |
| 56 | 2020 | Lawrence | Romania | 7-9 | both | cross-section | 280 | 139 | 141 | NA | questionnaire | ISAAC questionnaire |
| 57 | 2020 | Nkosi | Gauteng | 13-14 | both | cross-section | 3641 | 1766 | 1745 | NA | questionnaire | ISAAC questionnaire |
| 58 | 2020 | Reis | California | 2-11 | both | cross-section | 56312 | 28720 | 27592 | NA | landline and cell phone random-digit dial | questionnaire |
| 59 | 2020 | Tarazona-Meza | Peru | 9-19 | both | cross-section | 767 | 412 | 336 | NA | FFQ | ISAAC questionnaire |
| 60 | 2021 | Molnár | Hungary | 6-12 | both | cross-section | 3836 | 1857 | 1979 | NA | questionnaire | ISAAC questionnaire |
| 61 | 2021 | Antonogeorgos | Greece | 13-14 | both | cross-section | 1934 | 921 | 1013 | NA | FFQ | questionnaire |
| 62 | 2021 | Mendes | Portugal | 7-12 | both | cross-section | 647 | 330 | 317 | NA | 24- hour recall questionnaire | ISAAC questionnaire |
| 63 | 2021 | Wang | USA | 2-17 | both | cross-section | 4388 | 2148 | 2240 | NA | FFQ | questionnaire |

***Abbreviations:*** USA: the United States of America, UK: the United Kingdom, NA: not available, ATS-DLD: American Thoracic Society and Division of Lung Diseases, National Heart, Lung, and Blood Institute (ATS-DLD) questionnaire, ISAAC: International Study of Asthma and Allergies in Childhood, ECRHS: European Community Respiratory Health Survey, MDS: Mediterranean diet score.

**Table S4.** **Main statistical value of the studies conducted on diet and asthma/wheeze included in the meta-analysis.**

| **NO.** | **year** | | **first author** | **diet** | **frequence** | **outcome** | **effect estimate** | **adjust** | **Effect size** | **low** | **high** | **adjustment** |
| --- | --- | --- | --- | --- | --- | --- | --- | --- | --- | --- | --- | --- |
| 1 | 1996 | | Carey | Asian | NA | wheeze | OR | NO | 0.45 | 0.18 | 1.15 | NA |
| 1 | 1996 | | Carey | mostly Asian | NA | wheeze | OR | NO | 0.58 | 0.3 | 1.12 |
| 1 | 1996 | | Carey | Mixed | NA | wheeze | OR | NO | 0.55 | 0.3 | 1.01 |
| 2 | 1996 | | Hodge | fresh fish | NA | wheeze | OR | NO | 0.77 | 0.41 | 1.46 |
| 2 | 1996 | | Hodge | fresh fish | NA | wheeze | OR | YES | 0.81 | 0.41 | 1.6 | sex, ethnicity, country of birth, atopy, respiratory infection in the first two years of life and a parental history of asthma or smoking |
| 2 | 1996 | | Hodge | oily fish | NA | wheeze | OR | YES | 0.59 | 0.25 | 1.36 |
| 2 | 1996 | | Hodge | fresh fish | NA | asthma | OR | YES | 0.52 | 0.24 | 1.15 |
| 2 | 1996 | | Hodge | oily fish | NA | asthma | OR | YES | 0.26 | 0.09 | 0.72 |
| 2 | 1996 | | Hodge | oily fish | NA | wheeze | OR | NO | 0.53 | 0.24 | 1.17 | NA |
| 2 | 1996 | | Hodge | fresh fish | NA | asthma | OR | NO | 0.5 | 0.27 | 0.92 |
| 2 | 1996 | | Hodge | oily fish | NA | asthma | OR | NO | 0.29 | 0.13 | 0.67 |
| 3 | 2000 | | Forastiere | fruit | 1-2/week | wheeze | OR | YES | 0.75 | 0.63 | 0.89 | sex, study area, father’s education, household density, maternal smoking, paternal smoking, dampness or mould and parental asthma |
| 3 | 2000 | | Forastiere | fruit | 3-4/week | wheeze | OR | YES | 0.76 | 0.65 | 0.89 |
| 3 | 2000 | | Forastiere | fruit | 5-7/week | wheeze | OR | YES | 0.66 | 0.55 | 0.78 |
| 3 | 2000 | | Forastiere | fruit | 1-2/week | wheeze | OR | YES | 0.48 | 0.31 | 0.73 |
| 3 | 2000 | | Forastiere | fruit | 3-4/week | wheeze | OR | YES | 0.61 | 0.42 | 0.89 |
| 3 | 2000 | | Forastiere | fruit | 5-7/week | wheeze | OR | YES | 0.54 | 0.36 | 0.82 |
| 3 | 2000 | | Forastiere | fruit | >1-2/week | wheeze | OR | YES | 0.74 | 0.62 | 0.89 |
| 3 | 2000 | | Forastiere | fruit | >1-2/week | wheeze | OR | YES | 0.54 | 0.36 | 0.84 |
| 3 | 2000 | | Forastiere | fruit | >1-2/week | wheeze | OR | YES | 0.7 | 0.56 | 0.89 |
| 3 | 2000 | | Forastiere | fruit | >1-2/week | wheeze | OR | YES | 0.53 | 0.31 | 0.94 |
| 4 | 2000 | | Hijazi | vegetables | 2-3/day | asthma | OR | YES | 2.45 | 1.3 | 4.65 | place of residence, nationality, sex, mother's education, family history of asthma, total fat |
| 4 | 2000 | | Hijazi | vegetables | <2/day | asthma | OR | YES | 2.83 | 0.98 | 8.09 |
| 4 | 2000 | | Hijazi | milk | 2-3/day | asthma | OR | YES | 1.51 | 0.7 | 3.26 |
| 4 | 2000 | | Hijazi | milk | <2/day | asthma | OR | YES | 2.4 | 1.21 | 4.75 |
| 5 | 2001 | | Huang | deep-fried foods | NA | asthma | OR | YES | 2.13 | 1.06 | 4.3 | age, and diet variables for liver, deep-fried foods, oily fish, butcher’s meats, fruits & juices milk and egg |
| 5 | 2001 | | Huang | butcher's meats | NA | asthma | OR | YES | 1.84 | 0.89 | 3.8 |
| 6 | 2002 | | Takemura | fish | 1-2/week | asthma | OR | YES | 1.117 | 1.01 | 1.24 | age, gender, parental history of asthma, and vegetables and fruits intake |
| 6 | 2002 | | Takemura | fish | 3-4/week | asthma | OR | YES | 1.319 | 0.9 | 1.94 |
| 7 | 2003 | | Nafstad | fish | NA | asthma | RR | YES | 0.84 | 0.57 | 1.22 | parental atopy, atopic eczema 0–6 months of age, gender, parity, birth weight, maternal age at delivery, birth order uterus-related pregnancy complications, keeping pets at home when the child was born, an episode of lower respiratory tract infections during first year of life, maternal education, family income per year, maternal smoking at the end of pregnancy, and length of breastfeeding. |
| 7 | 2003 | | Nafstad | fish | NA | asthma | RR | NO | 0.65 | 0.46 | 0.92 | NA |
| 8 | 2003 | | Wijga | milk | 6-7/week | asthma | RR | YES | 0.82 | 0.55 | 1.21 | sex, birth weight, presence of older siblings (yes/no), parental allergy (having (had) asthma or  having an inhalant allergy), maternal level of education, breast feeding for at least 8 weeks (yes/no), and smoking in the home when the child was 2 years old (at least once a week v less than once a week), effects of region, maternal smoking during pregnancy, and parental asthma |
| 8 | 2003 | | Wijga | milk | 6-7/week | wheeze | RR | YES | 0.68 | 0.54 | 0.86 |
| 8 | 2003 | | Wijga | brown bread | 6-7/week | asthma | RR | YES | 0.6 | 0.39 | 0.93 |
| 8 | 2003 | | Wijga | brown bread | 6-7/week | wheeze | RR | YES | 1.01 | 0.74 | 1.33 |
| 8 | 2003 | | Wijga | margarine | 6-7/week | asthma | RR | YES | 0.82 | 0.51 | 1.31 |
| 8 | 2003 | | Wijga | margarine | 6-7/week | wheeze | RR | YES | 0.96 | 0.71 | 1.29 |
| 8 | 2003 | | Wijga | butter | 6-7/week | asthma | RR | YES | 0.73 | 0.31 | 1.72 |
| 8 | 2003 | | Wijga | butter | 6-7/week | wheeze | RR | YES | 1.12 | 0.71 | 1.77 |
| 8 | 2003 | | Wijga | milk | 6-7/week | asthma | RR | NO | 0.81 | 0.55 | 1.17 | NA |
| 8 | 2003 | | Wijga | milk | 6-7/week | wheeze | RR | NO | 0.7 | 0.56 | 0.88 |
| 8 | 2003 | | Wijga | brown bread | 6-7/week | asthma | RR | NO | 0.6 | 0.4 | 0.89 |
| 8 | 2003 | | Wijga | brown bread | 6-7/week | wheeze | RR | NO | 0.88 | 0.67 | 1.16 |
| 8 | 2003 | | Wijga | butter | 6-7/week | asthma | RR | NO | 0.73 | 0.32 | 1.67 |
| 8 | 2003 | | Wijga | butter | 6-7/week | wheeze | RR | NO | 1.08 | 0.7 | 1.66 |
| 9 | 2004 | | Demir | milk | 1/day | wheeze | OR | YES | 0.3 | 0.2 | 0.7 | age, sex, atopic family history, respiratory infection in the past, educational status of the  parents. |
| 9 | 2004 | | Demir | red meat | NA | wheeze | OR | YES | 2.2 | 1.2 | 3.8 |  |
| 10 | 2004 | | Wong | fruit | 1/day | wheeze | OR | NO | 0.71 | 0.57 | 0.89 | NA |
| 10 | 2004 | | Wong | fruit | 1/day | wheeze | OR | YES | 0.7 | 0.54 | 0.89 | age, sex |
| 10 | 2004 | | Wong | vegetables | 1/week | wheeze | OR | NO | 0.8 | 0.65 | 0.99 | NA |
| 10 | 2004 | | Wong | vegetables | 1/week | wheeze | OR | YES | 0.81 | 0.64 | 1.03 | age, sex |
| 11 | 2005 | | Kim | meat | NA | wheeze | OR | YES | 0.95 | 0.67 | 1.35 | age, gender, and all other dietary factors at the same time (type of fat and other  dietary factors) |
| 11 | 2005 | | Kim | meat | NA | doctor's asthma | OR | YES | 0.85 | 0.59 | 1.23 |
| 11 | 2005 | | Kim | meat | NA | current asthma | OR | YES | 0.85 | 0.59 | 1.23 |
| 11 | 2005 | | Kim | fish | NA | wheeze | OR | YES | 0.8 | 0.52 | 1.24 |
| 11 | 2005 | | Kim | fish | NA | doctor's asthma | OR | YES | 0.54 | 0.35 | 0.84 |
| 11 | 2005 | | Kim | fish | NA | current asthma | OR | YES | 0.51 | 0.31 | 0.84 |
| 11 | 2005 | | Kim | fruit | NA | wheeze | OR | YES | 1.14 | 0.82 | 1.59 |
| 11 | 2005 | | Kim | fruit | NA | doctor's asthma | OR | YES | 1.61 | 1.12 | 2.32 |
| 11 | 2005 | | Kim | fruit | NA | current asthma | OR | YES | 1.52 | 1.01 | 2.3 |
| 11 | 2005 | | Kim | milk | NA | wheeze | OR | YES | 0.83 | 0.66 | 1.03 |
| 11 | 2005 | | Kim | milk | NA | doctor's asthma | OR | YES | 0.75 | 0.61 | 0.94 |
| 11 | 2005 | | Kim | milk | NA | current asthma | OR | YES | 0.77 | 0.59 | 0.99 |
| 11 | 2005 | | Kim | vegetables | NA | wheeze | OR | YES | 0.92 | 0.7 | 1.21 |
| 11 | 2005 | | Kim | vegetables | NA | doctor's asthma | OR | YES | 0.86 | 0.66 | 1.13 |
| 11 | 2005 | | Kim | vegetables | NA | current asthma | OR | YES | 0.81 | 0.59 | 1.1 |
| 11 | 2005 | | Kim | fast food | NA | wheeze | OR | YES | 1.02 | 0.57 | 1.81 |
| 11 | 2005 | | Kim | fast food | NA | doctor's asthma | OR | YES | 1.2 | 0.66 | 2.17 |
| 11 | 2005 | | Kim | fast food | NA | current asthma | OR | YES | 1.53 | 0.8 | 2.92 |
| 11 | 2005 | | Kim | margarine | NA | wheeze | OR | YES | 0.68 | 0.38 | 1.23 |
| 11 | 2005 | | Kim | margarine | NA | doctor's asthma | OR | YES | 1.01 | 0.51 | 1.98 |
| 11 | 2005 | | Kim | margarine | NA | current asthma | OR | YES | 0.79 | 0.37 | 1.68 |
| 11 | 2005 | | Kim | butter | NA | wheeze | OR | YES | 0.95 | 0.51 | 1.79 |
| 11 | 2005 | | Kim | butter | NA | doctor's asthma | OR | YES | 0.68 | 0.32 | 1.44 |
| 11 | 2005 | | Kim | butter | NA | current asthma | OR | YES | 0.44 | 0.17 | 1.17 |
| 12 | 2005 | | Lewis | fruit | 7-13/week | wheeze | OR | YES | 0.77 | 0.64 | 0.93 | age, sex, and area (East Midlands or East of England) as a priori confounders and then looked at the independent effects of number of smokers in the household, distance from roads, and portions of fruit in a mutually adjusted model, with additional adjustment for the Townsend Index |
| 12 | 2005 | | Lewis | fruit | 1-6/week | wheeze | OR | YES | 0.8 | 0.67 | 0.95 |
| 13 | 2005 | | Njå | fruit or vegetable | NA | asthma | OR | YES | 0.57 | 0.37 | 0.88 | age, gender, area, parental education, parental atopy, exposure to dog and cat, and mothers’ smoking 0–11 mo and  during pregnancy |
| 14 | 2005 | | Wickens | fast food | <1/week | wheeze | OR | YES | 1.44 | 1.06 | 1.96 | body mass index, mother or father with history of allergic disease, family size , birth weight current smoking in the home, father's years of post primary education, frequency of hamburger, takeaway, fizzy drink, fish, fruit juice consumption, frequency of raw or cooked vegetable, fruit, meat consumption, the interaction of gender with hamburgers and takeaways, exercise gender, ethnicity and year born |
| 14 | 2005 | | Wickens | fast food | >1/week | wheeze | OR | YES | 1.65 | 1.07 | 2.52 |
| 14 | 2005 | | Wickens | fast food | <1/week | asthma | OR | YES | 1.25 | 0.9 | 1.7 |
| 14 | 2005 | | Wickens | fast food | >1/week | asthma | OR | YES | 1.27 | 0.82 | 1.98 |
| 15 | 2006 | | Hong | meat | NA | wheeze | OR | YES | 0.898 | 0.8 | 1.01 | age, sex, birth weight, breast-milk feeding, BMI, parental asthma, parental smoking socioeconomic status, and exercise |
| 15 | 2006 | | Hong | fresh seafood | NA | wheeze | OR | YES | 0.853 | 0.77 | 0.94 |
| 15 | 2006 | | Hong | fruit | NA | wheeze | OR | YES | 0.82 | 0.75 | 0.9 |
| 15 | 2006 | | Hong | vegetables | NA | wheeze | OR | YES | 0.84 | 0.78 | 0.91 |
| 15 | 2006 | | Hong | milk | NA | wheeze | OR | YES | 0.915 | 0.82 | 1.02 |
| 15 | 2006 | | Hong | fast food | NA | wheeze | OR | YES | 1.045 | 0.94 | 1.16 |
| 15 | 2006 | | Hong | margarine | NA | wheeze | OR | YES | 0.909 | 0.76 | 1.09 |
| 15 | 2006 | | Hong | cereals | NA | wheeze | OR | YES | 0.99 | 0.92 | 1.09 |
| 15 | 2006 | | Hong | pasta | NA | wheeze | OR | YES | 1.05 | 0.93 | 1.19 |
| 15 | 2006 | | Hong | rice | NA | wheeze | OR | YES | 0.97 | 0.87 | 1.07 |
| 15 | 2006 | | Hong | bread | NA | wheeze | OR | YES | 0.98 | 0.88 | 1.08 |
| 15 | 2006 | | Hong | butter | NA | wheeze | OR | YES | 0.98 | 0.84 | 1.15 |
| 15 | 2006 | | Hong | nuts | NA | wheeze | OR | YES | 1.03 | 0.88 | 1.21 |
| 15 | 2006 | | Hong | potato | NA | wheeze | OR | YES | 0.99 | 0.89 | 1.11 |
| 16 | 2006 | | Pastorino | fruit | NA | asthma | OR | NO | 0.39 | 0.16 | 0.97 | NA |
| 16 | 2006 | | Pastorino | fruit | NA | asthma | OR | YES | 0.31 | 0.08 | 1.21 |
| 16 | 2006 | | Pastorino | cooked vegetables | NA | asthma | OR | NO | 0.54 | 0.31 | 0.96 |
| 16 | 2006 | | Pastorino | cooked vegetables | NA | asthma | OR | YES | 0.37 | 0.18 | 0.79 |
| 17 | 2006 | | Tabak | fruit | NA | wheeze | OR | YES | 0.96 | 0.56 | 1.66 | Educational level of the mother, foreign descent, and total energy intake. |
| 17 | 2006 | | Tabak | fruit | NA | asthma | OR | YES | 0.65 | 0.37 | 1.14 |
| 17 | 2006 | | Tabak | vegetables | NA | wheeze | OR | YES | 1.24 | 0.69 | 2.23 |
| 17 | 2006 | | Tabak | vegetables | NA | asthma | OR | YES | 0.69 | 0.33 | 1.45 |
| 17 | 2006 | | Tabak | fish | NA | asthma | OR | YES | 0.32 | 0.13 | 0.81 |
| 17 | 2006 | | Tabak | fish | NA | wheeze | OR | YES | 0.42 | 0.2 | 0.89 |
| 17 | 2006 | | Tabak | fruit | NA | asthma | OR | NO | 0.61 | 0.35 | 1.05 | NA |
| 17 | 2006 | | Tabak | vegetables | NA | wheeze | OR | NO | 1.15 | 0.66 | 2 |
| 17 | 2006 | | Tabak | vegetables | NA | asthma | OR | NO | 0.67 | 0.32 | 1.38 |
| 17 | 2006 | | Tabak | fish | NA | wheeze | OR | NO | 0.4 | 0.19 | 0.84 |
| 17 | 2006 | | Tabak | fish | NA | asthma | OR | NO | 0.31 | 0.13 | 0.78 |
| 17 | 2006 | | Tabak | fruit | NA | wheeze | OR | NO | 0.88 | 0.52 | 1.48 |
| 18 | 2007 | | Chatzi | fish | high | wheeze | OR | YES | 0.48 | 0.21 | 1.09 | gender, maternal and parental asthma, maternal and paternal atopy, maternal smoking BMI at age 6.5 yr, maternal and paternal education and social class, breastfeeding, fish intake during pregnancy, and number of siblings at age 6.5 yr |
| 18 | 2007 | | Chatzi | vegetables | high | wheeze | OR | YES | 0.38 | 0.15 | 0.95 |
| 19 | 2007 | | Garcia-Marcos | meat | 1-2/week | asthma | OR | YES | 0.56 | 0.2 | 1.58 | sex, obesity, maternal smoking, siblings and exercise |
| 19 | 2007 | | Garcia-Marcos | meat | >3/week | asthma | OR | YES | 0.43 | 0.15 | 1.18 |
| 19 | 2007 | | Garcia-Marcos | seafood | 1-2/week | asthma | OR | YES | 0.63 | 0.44 | 0.91 |
| 19 | 2007 | | Garcia-Marcos | seafood | >3/week | asthma | OR | YES | 0.53 | 0.35 | 0.8 |
| 19 | 2007 | | Garcia-Marcos | fruit | 1-2/week | asthma | OR | YES | 0.87 | 0.55 | 1.35 |
| 19 | 2007 | | Garcia-Marcos | fruit | >3/week | asthma | OR | YES | 0.74 | 0.5 | 1.1 |
| 19 | 2007 | | Garcia-Marcos | vegetables | 1-2/week | asthma | OR | YES | 0.87 | 0.63 | 1.21 |
| 19 | 2007 | | Garcia-Marcos | vegetables | >3/week | asthma | OR | YES | 0.78 | 0.56 | 1.11 |
| 19 | 2007 | | Garcia-Marcos | cereals | 1-2/week | asthma | OR | YES | 0.56 | 0.3 | 1.02 |
| 19 | 2007 | | Garcia-Marcos | cereals | >3/week | asthma | OR | YES | 0.39 | 0.23 | 0.68 |
| 19 | 2007 | | Garcia-Marcos | pasta | 1-2/week | asthma | OR | YES | 0.58 | 0.32 | 1.05 |
| 19 | 2007 | | Garcia-Marcos | pasta | >3/week | asthma | OR | YES | 0.74 | 0.4 | 1.37 |
| 19 | 2007 | | Garcia-Marcos | rice | 1-2/week | asthma | OR | YES | 0.8 | 0.51 | 1.27 |
| 19 | 2007 | | Garcia-Marcos | rice | >3/week | asthma | OR | YES | 1.13 | 0.68 | 1.88 |
| 19 | 2007 | | Garcia-Marcos | butter | 1-2/week | asthma | OR | YES | 1.15 | 0.89 | 1.49 |
| 19 | 2007 | | Garcia-Marcos | butter | >3/week | asthma | OR | YES | 0.78 | 0.48 | 1.25 |
| 19 | 2007 | | Garcia-Marcos | margarine | 1-2/week | asthma | OR | YES | 1.02 | 0.77 | 1.35 |
| 19 | 2007 | | Garcia-Marcos | margarine | >3/week | asthma | OR | YES | 1.2 | 0.8 | 1.79 |
| 19 | 2007 | | Garcia-Marcos | nuts | 1-2/week | asthma | OR | YES | 0.96 | 0.77 | 1.22 |
| 19 | 2007 | | Garcia-Marcos | nuts | >3/week | asthma | OR | YES | 1.31 | 0.86 | 2.01 |
| 19 | 2007 | | Garcia-Marcos | potato | 1-2/week | asthma | OR | YES | 0.47 | 0.28 | 0.81 |
| 19 | 2007 | | Garcia-Marcos | potato | >3/week | asthma | OR | YES | 0.59 | 0.35 | 1.01 |
| 19 | 2007 | | Garcia-Marcos | milk | 1-2/week | asthma | OR | YES | 0.65 | 0.31 | 1.4 |
| 19 | 2007 | | Garcia-Marcos | milk | >3/week | asthma | OR | YES | 0.5 | 0.28 | 0.9 |
| 19 | 2007 | | Garcia-Marcos | eggs | 1-2/week | asthma | OR | YES | 0.57 | 0.38 | 0.84 |
| 19 | 2007 | | Garcia-Marcos | eggs | >3/week | asthma | OR | YES | 0.7 | 0.45 | 1.09 |
| 19 | 2007 | | Garcia-Marcos | fast food | 1-2/week | asthma | OR | YES | 1.64 | 1.28 | 2.1 |
| 19 | 2007 | | Garcia-Marcos | fast food | >3/week | asthma | OR | YES | 2.26 | 1.09 | 4.68 |
| 19 | 2007 | | Garcia-Marcos | mediterranean diet | 1-2/week | asthma | OR | YES | 0.9 | 0.82 | 0.98 |
| 19 | 2007 | | Garcia-Marcos | mediterranean diet | >3/week | asthma | OR | YES | 0.98 | 0.91 | 1.06 |
| 20 | 2007 | | Okoko | fruit | NA | wheeze | OR | YES | 0.69 | 0.5 | 0.95 | age, sex, history of breastfeeding, birth weight, parent's education, family history of asthma, ethnic |
| 21 | 2007 | | Tsai | meat | NA | wheeze | OR | YES | 0.98 | 0.92 | 1.05 | Residential districts, gender, physician-diagnosed allergy. |
| 21 | 2007 | | Tsai | fish | NA | wheeze | OR | YES | 1.05 | 0.98 | 1.13 |
| 21 | 2007 | | Tsai | seafood | NA | wheeze | OR | YES | 0.99 | 0.9 | 1.09 |
| 21 | 2007 | | Tsai | eggs | NA | wheeze | OR | YES | 1.12 | 1.05 | 1.2 |
| 21 | 2007 | | Tsai | dairy products | NA | wheeze | OR | YES | 0.99 | 0.93 | 1.04 |
| 21 | 2007 | | Tsai | soy products | NA | wheeze | OR | YES | 0.88 | 0.81 | 0.97 |
| 21 | 2007 | | Tsai | vegetables | NA | wheeze | OR | YES | 0.99 | 0.92 | 1.06 |
| 21 | 2007 | | Tsai | fruit | NA | wheeze | OR | YES | 0.91 | 0.85 | 0.98 |
| 21 | 2007 | | Tsai | meat | NA | asthma | OR | YES | 1.02 | 0.95 | 1.09 |
| 21 | 2007 | | Tsai | fish | NA | asthma | OR | YES | 0.96 | 0.89 | 1.04 |
| 21 | 2007 | | Tsai | seafood | NA | asthma | OR | YES | 0.87 | 0.77 | 0.97 |
| 21 | 2007 | | Tsai | eggs | NA | asthma | OR | YES | 1.05 | 0.98 | 1.13 |
| 21 | 2007 | | Tsai | dairy products | NA | asthma | OR | YES | 1.04 | 0.98 | 1.1 |
| 21 | 2007 | | Tsai | soy products | NA | asthma | OR | YES | 0.99 | 0.91 | 1.07 |
| 21 | 2007 | | Tsai | vegetables | NA | asthma | OR | YES | 1.01 | 0.93 | 1.07 |
| 21 | 2007 | | Tsai | fruit | NA | asthma | OR | YES | 0.96 | 0.89 | 1.02 |
| 22 | 2007 | | Waser | milk | NA | asthma | OR | YES | 0.74 | 0.61 | 0.88 | study group, country, sex, age, mother’s and father’s reported asthma and/or hay fever, parent’s education, maternal smoking during pregnancy, current environmental smoking at home, older siblings, exclusive breastfeeding 44 months BMI, food avoidance due to familial asthma and/or allergy. |
| 22 | 2007 | | Waser | yoghurt | NA | asthma | OR | YES | 0.81 | 0.67 | 0.98 |
| 22 | 2007 | | Waser | eggs | NA | asthma | OR | YES | 0.81 | 0.69 | 0.95 |
| 22 | 2007 | | Waser | vegetables | NA | asthma | OR | YES | 0.9 | 0.78 | 1.04 |
| 22 | 2007 | | Waser | milk | NA | wheeze | OR | YES | 0.86 | 0.72 | 1.04 |
| 22 | 2007 | | Waser | yoghurt | NA | wheeze | OR | YES | 0.92 | 0.75 | 1.12 |
| 22 | 2007 | | Waser | eggs | NA | wheeze | OR | YES | 0.84 | 0.71 | 0.99 |
| 22 | 2007 | | Waser | vegetables | NA | wheeze | OR | YES | 0.92 | 0.79 | 1.07 |
| 23 | 2008 | | Corbo | fruit | 1-2/week | wheeze | OR | YES | 0.83 | 0.67 | 1.04 | sex, age, study center, season, person filling the questionnaire, parental education, parental smoking, mold in child’s bedroom, history of family asthma or rhinitis. |
| 23 | 2008 | | Corbo | fruit | 3-4/week | wheeze | OR | YES | 0.76 | 0.61 | 0.94 |
| 23 | 2008 | | Corbo | fruit | >5/week | wheeze | OR | YES | 0.76 | 0.62 | 0.93 |
| 23 | 2008 | | Corbo | fruit | 1-2/week | asthma | OR | YES | 0.84 | 0.66 | 1.06 |
| 23 | 2008 | | Corbo | fruit | 3-4/week | asthma | OR | YES | 0.73 | 0.58 | 0.92 |
| 23 | 2008 | | Corbo | fruit | >5/week | asthma | OR | YES | 0.76 | 0.61 | 0.95 |
| 24 | 2008 | | de Batlle | mediterranean diet | 4-8 score | asthma | OR | NO | 0.59 | 0.36 | 0.89 | NA |
| 24 | 2008 | | de Batlle | mediterranean diet | 4-8 score | wheeze | OR | NO | 0.62 | 0.46 | 0.83 |
| 24 | 2008 | | de Batlle | mediterranean diet | 4-8 score | asthma | OR | YES | 0.6 | 0.4 | 0.91 | gender, maternal education, physical exercise, current tobacco smoking at home, maternal asthma, and maternal rhinitis. |
| 24 | 2008 | | de Batlle | mediterranean diet | 4-8 score | wheeze | OR | YES | 0.64 | 0.47 | 0.87 |
| 25 | 2008 | | Foliaki | meat | >3/week | wheeze | OR | YES | 1.04 | 0.9 | 1.2 | age, sex and country |
| 25 | 2008 | | Foliaki | pasta | >1/week | wheeze | OR | YES | 1.05 | 0.9 | 1.22 |
| 25 | 2008 | | Foliaki | rice | >1/week | wheeze | OR | YES | 1.17 | 0.72 | 1.91 |
| 25 | 2008 | | Foliaki | butter | >1/week | wheeze | OR | YES | 1.05 | 0.89 | 1.24 |
| 25 | 2008 | | Foliaki | margarine | >1/week | wheeze | OR | YES | 1.19 | 1.01 | 1.4 |
| 25 | 2008 | | Foliaki | nuts | >1/week | wheeze | OR | YES | 0.8 | 0.66 | 0.98 |
| 25 | 2008 | | Foliaki | milk | >1/week | wheeze | OR | YES | 1.02 | 0.89 | 1.17 |
| 25 | 2008 | | Foliaki | meat | >3/week | asthma | OR | YES | 1.09 | 0.97 | 1.23 |
| 25 | 2008 | | Foliaki | pasta | >1/week | asthma | OR | YES | 1.25 | 1.06 | 1.49 |
| 25 | 2008 | | Foliaki | rice | >1/week | asthma | OR | YES | 1.45 | 0.97 | 2.17 |
| 25 | 2008 | | Foliaki | butter | >1/week | asthma | OR | YES | 1.11 | 0.97 | 1.28 |
| 25 | 2008 | | Foliaki | margarine | >1/week | asthma | OR | YES | 1.25 | 1.09 | 1.43 |
| 25 | 2008 | | Foliaki | nuts | >1/week | asthma | OR | YES | 0.8 | 0.66 | 0.98 |
| 25 | 2008 | | Foliaki | milk | >1/week | asthma | OR | YES | 1.02 | 0.89 | 1.17 |
| 26 | 2008 | | Garcia | meat | 1-2/week | asthma | OR | YES | 0.7 | 0.4 | 1.01 | Demographic characteristics; pre- and perinatal characteristics (regular contact of the mother with farm animal’s cesarean birth); post-natal characteristics; dietary habits, behavioral characteristics; household and neighborhood characteristics and medications. |
| 26 | 2008 | | Garcia | milk | >3/week | asthma | OR | NO | 1.5 | 1.01 | 2.2 |
| 26 | 2008 | | Garcia | meat | >3/week | asthma | OR | YES | 0.9 | 0.6 | 1.5 |
| 26 | 2008 | | Garcia | fruit | 1-2/week | asthma | OR | YES | 0.6 | 0.4 | 1.1 |
| 26 | 2008 | | Garcia | fruit | >3/week | asthma | OR | YES | 0.6 | 0.4 | 0.9 |
| 26 | 2008 | | Garcia | cereals | >3/week | asthma | OR | YES | 1.5 | 1.1 | 1.9 |
| 26 | 2008 | | Garcia | butter | 1-2/week | asthma | OR | YES | 1.2 | 0.9 | 1.6 |
| 26 | 2008 | | Garcia | butter | >3/week | asthma | OR | YES | 1.1 | 0.8 | 1.6 |
| 26 | 2008 | | Garcia | milk | >3/week | asthma | OR | YES | 0.8 | 0.6 | 0.9 |
| 26 | 2008 | | Garcia | eggs | 1-2/week | asthma | OR | YES | 0.8 | 0.5 | 1.1 |
| 26 | 2008 | | Garcia | eggs | >3/week | asthma | OR | YES | 0.7 | 0.5 | 0.9 |
| 26 | 2008 | | Garcia | fast food | 1-2/week | asthma | OR | YES | 1.1 | 0.9 | 1.5 |
| 26 | 2008 | | Garcia | fast food | >3/week | asthma | OR | YES | 1.01 | 0.7 | 1.6 |
| 26 | 2008 | | Garcia | milk | >3/week | asthma | OR | NO | 1.3 | 0.9 | 1.8 | NA |
| 26 | 2008 | | Garcia | cereals | >3/week | asthma | OR | NO | 1.4 | 1.01 | 1.7 |
| 26 | 2008 | | Garcia | meat | 1-2/week | asthma | OR | NO | 0.7 | 0.5 | 1.1 |
| 26 | 2008 | | Garcia | meat | >3/week | asthma | OR | NO | 1.1 | 0.7 | 1.6 |
| 26 | 2008 | | Garcia | fruit | 1-2/week | asthma | OR | NO | 0.6 | 0.4 | 1.01 |
| 26 | 2008 | | Garcia | fruit | >3/week | asthma | OR | NO | 0.6 | 0.4 | 0.99 |
| 26 | 2008 | | Garcia | butter | 1-2/week | asthma | OR | NO | 1.3 | 1.01 | 1.6 |
| 26 | 2008 | | Garcia | butter | >3/week | asthma | OR | NO | 1.2 | 0.8 | 1.7 |
| 26 | 2008 | | Garcia | milk | >3/week | asthma | OR | NO | 0.8 | 0.6 | 1.01 |
| 26 | 2008 | | Garcia | eggs | 1-2/week | asthma | OR | NO | 0.8 | 0.6 | 1.1 |
| 26 | 2008 | | Garcia | eggs | >3/week | asthma | OR | NO | 0.7 | 0.5 | 1.1 |
| 26 | 2008 | | Garcia | fast food | 1-2/week | asthma | OR | NO | 1.2 | 0.9 | 1.5 |
| 26 | 2008 | | Garcia | fast food | >3/week | asthma | OR | NO | 1.01 | 0.7 | 1.5 |
| 27 | 2009 | | Gutiérrez-Delgado | vegetables | frequency | wheeze | OR | YES | 0.68 | 0.49 | 0.93 | sex, passive smoking in the first year of life, atopic family history, respiratory infection in the first year of life  and age |
| 27 | 2009 | | Gutiérrez-Delgado | seafood | frequency | wheeze | OR | YES | 0.79 | 0.6 | 1.06 |
| 27 | 2009 | | Gutiérrez-Delgado | pasta | frequency | wheeze | OR | YES | 1.04 | 0.7 | 1.41 |
| 27 | 2009 | | Gutiérrez-Delgado | fast food | frequency | wheeze | OR | YES | 1.82 | 1.16 | 2.87 |
| 28 | 2009 | | Mai | fast food | NA | asthma | OR | YES | 1.59 | 1.13 | 2.25 | sex, maternal asthma, location, overweight and family income besides the adjustment for First Nations origin and  exclusive breastfeeding |
| 28 | 2009 | | Mai | fast food | NA | asthma | OR | YES | 2.06 | 1.29 | 3.3 |
| 28 | 2009 | | Mai | fast food | NA | asthma | OR | YES | 1.32 | 0.78 | 2.23 |
| 28 | 2009 | | Mai | fast food | NA | asthma | OR | NO | 1.7 | 1.23 | 2.34 | NA |
| 28 | 2009 | | Mai | fast food | NA | asthma | OR | NO | 2.04 | 1.33 | 3.13 |
| 28 | 2009 | | Mai | fast food | NA | asthma | OR | NO | 1.33 | 0.81 | 2.16 |
| 29 | 2010 | | Gonzalez Barcala | mediterranean diet | NA | asthma | OR | YES | 0.94 | 0.71 | 1.23 | BMI, parental smoking, and maternal education |
| 29 | 2010 | | Gonzalez Barcala | mediterranean diet | NA | asthma | OR | YES | 1.03 | 0.74 | 1.44 |
| 29 | 2010 | | Gonzalez Barcala | mediterranean diet | NA | asthma | OR | YES | 0.88 | 0.58 | 1.33 |
| 29 | 2010 | | Gonzalez Barcala | mediterranean diet | NA | asthma | OR | YES | 1.28 | 0.92 | 1.77 |
| 30 | 2010 | | Rodríguez-Rodríguez | meat | NA | asthma | OR | YES | 1.02 | 0.25 | 4.15 | age, weight, height, BMI, sex, family background, parent's smoking habit. |
| 30 | 2010 | | Rodríguez-Rodríguez | fish | NA | asthma | OR | YES | 1.22 | 0.38 | 3.98 |
| 30 | 2010 | | Rodríguez-Rodríguez | eggs | NA | asthma | OR | YES | 0.35 | 0.11 | 1.05 |
| 30 | 2010 | | Rodríguez-Rodríguez | butter | NA | asthma | OR | YES | 2.97 | 1.01 | 8.68 |
| 30 | 2010 | | Rodríguez-Rodríguez | margarine | NA | asthma | OR | YES | 0.45 | 0.07 | 2.76 |
| 31 | 2011 | | Arvaniti | mediterranean diet | NA | asthma | OR | YES | 0.84 | 0.72 | 0.96 | age, sex, body mass index, physical activity status (during school time as well as other activities), parental education  status (academic vs nonacademic), and overall dietary habits (through the KIDMED index) |
| 31 | 2011 | | Arvaniti | mediterranean diet | NA | asthma | OR | YES | 0.86 | 0.75 | 0.98 |
| 32 | 2011 | | Goksör | fish | NA | wheeze | RR | YES | 0.6 | 0.4 | 0.8 | maternal smoking during pregnancy and any breastfeeding for 4 months or more socio-economic status |
| 33 | 2011 | | Willers | fruit | NA | wheeze | RR | YES | 0.98 | 0.86 | 1.13 | sex, maternal educational level, parental atopy, maternal smoking during pregnancy, smoking in the house at 8 yrs of age, breast feeding, presence of older siblings, birth weight, overweight mother, overweight child at 8 yrs of age, geographical region and study arm (intervention or natural history) |
| 33 | 2011 | | Willers | fruit | NA | asthma | RR | YES | 0.9 | 0.82 | 0.99 |
| 33 | 2011 | | Willers | vegetables | NA | wheeze | RR | YES | 1.22 | 1.04 | 1.44 |
| 33 | 2011 | | Willers | vegetables | NA | asthma | RR | YES | 1.1 | 0.98 | 1.24 |
| 33 | 2011 | | Willers | brown bread | NA | wheeze | RR | YES | 0.91 | 0.78 | 1.06 |
| 33 | 2011 | | Willers | brown bread | NA | asthma | RR | YES | 0.95 | 0.84 | 1.07 |
| 33 | 2011 | | Willers | fish | NA | wheeze | RR | YES | 1.32 | 0.97 | 1.8 |
| 33 | 2011 | | Willers | fish | NA | asthma | RR | YES | 1.23 | 0.97 | 1.57 |
| 33 | 2011 | | Willers | butter | NA | wheeze | RR | YES | 1.05 | 0.92 | 1.19 |
| 33 | 2011 | | Willers | butter | NA | asthma | RR | YES | 0.99 | 0.89 | 1.1 |
| 33 | 2011 | | Willers | margarine | NA | wheeze | RR | YES | 1.01 | 0.9 | 1.11 |
| 33 | 2011 | | Willers | margarine | NA | asthma | RR | YES | 1.01 | 0.92 | 1.08 |
| 34 | 2012 | | Kiefte-de Jong | fish | NA | wheeze | RR | YES | 0.64 | 0.43 | 0.94 | maternal age, maternal BMI, maternal alcohol and smoking during pregnancy, household income, maternal educational background, family history of asthma, eczema, hay fever or allergy to house dust, maternal fish consumption during pregnancy, folic acid supplementation during pregnancy, parity, birth weight, gestational age, infant’s gender, infant’s ethnicity, breastfeeding duration, early day-care attendance, any vitamin D supplementation in first year of life |
| 35 | 2013 | | Goksör | fish | NA | asthma | RR | YES | 0.6 | 0.4 | 0.96 | maternal smoking during pregnancy and any breastfeeding for 4 months or more socio-economic status |
| 36 | 2013 | | Lawson | fast food | NA | asthma | OR | NO | 1.6 | 0.95 | 2.69 | NA |
| 36 | 2013 | | Lawson | fish | NA | asthma | OR | NO | 0.94 | 0.53 | 1.67 |
| 36 | 2013 | | Lawson | fast food | NA | asthma | OR | YES | 1.55 | 0.86 | 2.79 | sex, presence of a home air filter, maternal smoking during pregnancy, bare floor in the bedroom in the first year of life age group, season of testing, tobacco smoke exposure, and each of the variables listed in the column |
| 36 | 2013 | | Lawson | fish | NA | asthma | OR | YES | 1.01 | 0.52 | 1.92 |
| 37 | 2014 | | Akcay | fruit | high | asthma | OR | YES | 1.06 | 0.86 | 1.3 | sex, region of district, being born in Istanbul, time lived in Istanbul, education level of child’s mother and father   presence of fish, dog and bird at home during last 12 months, and smoking of child’s father |
| 37 | 2014 | | Akcay | margarine | high | asthma | OR | YES | 1.28 | 1.04 | 1.58 |
| 37 | 2014 | | Akcay | eggs | high | asthma | OR | YES | 1.13 | 0.95 | 1.34 |
| 37 | 2014 | | Akcay | meat | high | asthma | OR | YES | 1.26 | 1.04 | 1.52 |
| 38 | 2014 | | D'Innocenzo | fish | high | wheeze | OR | YES | 0.73 | 0.56 | 0.94 | gender, child age, socioeconomic indicators, parent asthma, fecal whereabouts, tap water in the home, parasites, energy smoking in the home, maternal age, and child body mass index |
| 38 | 2014 | | D'Innocenzo | vegetables | high | wheeze | OR | YES | 0.98 | 0.67 | 1.42 |
| 38 | 2014 | | D'Innocenzo | fruit | high | wheeze | OR | YES | 0.8 | 0.56 | 1.15 |
| 38 | 2014 | | D'Innocenzo | cereals | high | wheeze | OR | YES | 0.8 | 0.54 | 1.19 |
| 38 | 2014 | | D'Innocenzo | fish | high | asthma | OR | YES | 0.63 | 0.47 | 0.83 |
| 38 | 2014 | | D'Innocenzo | vegetables | high | asthma | OR | YES | 0.92 | 0.6 | 1.41 |
| 38 | 2014 | | D'Innocenzo | fruit | high | asthma | OR | YES | 0.85 | 0.57 | 1.26 |
| 38 | 2014 | | D'Innocenzo | cereals | high | asthma | OR | YES | 0.74 | 0.52 | 1.04 |
| 39 | 2014 | | Patel | western | high | wheeze | OR | YES | 1.54 | 0.77 | 3.07 | gender, parental asthma, parental smoking, BMI z-score, socio-economic status, energy intake and allergic sensitization |
| 39 | 2014 | | Patel | traditional | high | wheeze | OR | YES | 0.94 | 0.5 | 1.77 |
| 39 | 2014 | | Patel | other | high | wheeze | OR | YES | 1.65 | 0.88 | 3.08 |
| 39 | 2014 | | Patel | western | high | asthma | OR | YES | 2.59 | 1.15 | 5.81 |
| 39 | 2014 | | Patel | traditional | high | asthma | OR | YES | 0.78 | 0.36 | 1.67 |
| 39 | 2014 | | Patel | other | high | asthma | OR | YES | 1.85 | 0.9 | 3.8 |
| 39 | 2014 | | Patel | western | high | wheeze | RR | YES | 1.81 | 0.98 | 3.37 |
| 39 | 2014 | | Patel | traditional | high | wheeze | RR | YES | 1.03 | 0.55 | 1.9 |
| 39 | 2014 | | Patel | other | high | wheeze | RR | YES | 1.12 | 0.61 | 2.07 |
| 39 | 2014 | | Patel | western | high | asthma | RR | YES | 2.2 | 1.07 | 4.51 |
| 39 | 2014 | | Patel | traditional | high | asthma | RR | YES | 0.79 | 0.4 | 1.57 |
| 39 | 2014 | | Patel | other | high | asthma | RR | YES | 0.88 | 0.44 | 1.78 |
| 40 | 2015 | | Cepeda | meat | 1-2/week | wheeze | OR | YES | 0.8 | 0.47 | 1.34 | Maternal educational level, current maternal smoking, maternal smoking during the first year of life, and physical activity of the child. |
| 40 | 2015 | | Cepeda | meat | >3/week | wheeze | OR | YES | 0.79 | 0.48 | 1.3 |
| 40 | 2015 | | Cepeda | seafood | 1-2/week | wheeze | OR | YES | 0.96 | 0.77 | 1.2 |
| 40 | 2015 | | Cepeda | seafood | >3/week | wheeze | OR | YES | 1.29 | 0.96 | 1.73 |
| 40 | 2015 | | Cepeda | butter | 1-2/week | wheeze | OR | YES | 0.88 | 0.69 | 1.13 |
| 40 | 2015 | | Cepeda | butter | >3/week | wheeze | OR | YES | 0.87 | 0.67 | 1.13 |
| 40 | 2015 | | Cepeda | margarine | 1-2/week | wheeze | OR | YES | 1.1 | 0.86 | 1.41 |
| 40 | 2015 | | Cepeda | margarine | >3/week | wheeze | OR | YES | 0.92 | 0.72 | 1.24 |
| 40 | 2015 | | Cepeda | milk | 1-2/week | wheeze | OR | YES | 0.74 | 0.45 | 1.21 |
| 40 | 2015 | | Cepeda | milk | >3/week | wheeze | OR | YES | 0.68 | 0.43 | 1.06 |
| 40 | 2015 | | Cepeda | eggs | 1-2/week | wheeze | OR | YES | 1.31 | 0.86 | 2.01 |
| 40 | 2015 | | Cepeda | eggs | >3/week | wheeze | OR | YES | 1.4 | 0.91 | 2.16 |
| 40 | 2015 | | Cepeda | fruit | 1-2/week | wheeze | OR | YES | 0.99 | 0.71 | 1.39 |
| 40 | 2015 | | Cepeda | fruit | >3/week | wheeze | OR | YES | 0.87 | 0.63 | 1.21 |
| 40 | 2015 | | Cepeda | vegetables | 1-2/week | wheeze | OR | YES | 1.32 | 0.99 | 1.75 |
| 40 | 2015 | | Cepeda | vegetables | >3/week | wheeze | OR | YES | 1.07 | 0.81 | 1.41 |
| 40 | 2015 | | Cepeda | nuts | 1-2/week | wheeze | OR | YES | 0.89 | 0.68 | 1.16 |
| 40 | 2015 | | Cepeda | nuts | >3/week | wheeze | OR | YES | 0.97 | 0.68 | 1.39 |
| 40 | 2015 | | Cepeda | potato | 1-2/week | wheeze | OR | YES | 0.41 | 0.29 | 0.58 |
| 40 | 2015 | | Cepeda | potato | >3/week | wheeze | OR | YES | 0.44 | 0.31 | 0.62 |
| 40 | 2015 | | Cepeda | cereals | 1-2/week | wheeze | OR | YES | 1.01 | 0.66 | 1.52 |
| 40 | 2015 | | Cepeda | cereals | >3/week | wheeze | OR | YES | 0.87 | 0.58 | 1.28 |
| 40 | 2015 | | Cepeda | pasta | 1-2/week | wheeze | OR | YES | 0.9 | 0.68 | 1.21 |
| 40 | 2015 | | Cepeda | pasta | >3/week | wheeze | OR | YES | 0.97 | 0.7 | 1.33 |
| 40 | 2015 | | Cepeda | rice | 1-2/week | wheeze | OR | YES | 0.51 | 0.3 | 0.85 |
| 40 | 2015 | | Cepeda | rice | >3/week | wheeze | OR | YES | 0.59 | 0.37 | 0.93 |
| 40 | 2015 | | Cepeda | fast food | 1-2/week | wheeze | OR | YES | 1.11 | 0.88 | 1.4 |
| 40 | 2015 | | Cepeda | fast food | >3/week | wheeze | OR | YES | 1.74 | 1.3 | 2.34 |
| 40 | 2015 | | Cepeda | meat | 1-2/week | wheeze | OR | NO | 0.83 | 0.49 | 1.39 | NA |
| 40 | 2015 | | Cepeda | meat | >3/week | wheeze | OR | NO | 0.82 | 0.5 | 1.35 |
| 40 | 2015 | | Cepeda | seafood | 1-2/week | wheeze | OR | NO | 0.96 | 0.77 | 1.2 |
| 40 | 2015 | | Cepeda | seafood | >3/week | wheeze | OR | NO | 1.29 | 0.96 | 1.73 |
| 40 | 2015 | | Cepeda | butter | 1-2/week | wheeze | OR | NO | 0.89 | 0.69 | 1.13 |
| 40 | 2015 | | Cepeda | butter | >3/week | wheeze | OR | NO | 0.87 | 0.67 | 1.13 |
| 40 | 2015 | | Cepeda | margarine | 1-2/week | wheeze | OR | NO | 1.09 | 0.85 | 1.39 |
| 40 | 2015 | | Cepeda | margarine | >3/week | wheeze | OR | NO | 0.93 | 0.7 | 1.22 |
| 40 | 2015 | | Cepeda | mik | 1-2/week | wheeze | OR | NO | 0.69 | 0.43 | 1.13 |
| 40 | 2015 | | Cepeda | milk | >3/week | wheeze | OR | NO | 0.66 | 0.42 | 1.03 |
| 40 | 2015 | | Cepeda | eggs | 1-2/week | wheeze | OR | NO | 1.32 | 0.86 | 2.01 |
| 40 | 2015 | | Cepeda | eggs | >3/week | wheeze | OR | NO | 1.39 | 0.9 | 2.13 |
| 40 | 2015 | | Cepeda | fruit | 1-2/week | wheeze | OR | NO | 0.96 | 0.69 | 1.35 |
| 40 | 2015 | | Cepeda | fruit | >3/week | wheeze | OR | NO | 0.86 | 0.62 | 1.19 |
| 40 | 2015 | | Cepeda | vegetables | 1-2/week | wheeze | OR | NO | 1.32 | 0.99 | 1.75 |
| 40 | 2015 | | Cepeda | vegetables | >3/week | wheeze | OR | NO | 1.06 | 0.81 | 1.4 |
| 40 | 2015 | | Cepeda | nuts | 1-2/week | wheeze | OR | NO | 0.92 | 0.71 | 1.19 |
| 40 | 2015 | | Cepeda | nuts | >3/week | wheeze | OR | NO | 1.04 | 0.73 | 1.48 |
| 40 | 2015 | | Cepeda | potato | 1-2/week | wheeze | OR | NO | 0.41 | 0.3 | 0.59 |
| 40 | 2015 | | Cepeda | potato | >3/week | wheeze | OR | NO | 0.44 | 0.31 | 0.62 |
| 40 | 2015 | | Cepeda | cereals | 1-2/week | wheeze | OR | NO | 1.01 | 0.67 | 1.53 |
| 40 | 2015 | | Cepeda | cereals | >3/week | wheeze | OR | NO | 0.87 | 0.59 | 1.29 |
| 40 | 2015 | | Cepeda | pasta | 1-2/week | wheeze | OR | NO | 0.9 | 0.67 | 1.21 |
| 40 | 2015 | | Cepeda | pasta | >3/week | wheeze | OR | NO | 0.95 | 0.7 | 1.31 |
| 40 | 2015 | | Cepeda | rice | 1-2/week | wheeze | OR | NO | 0.5 | 0.3 | 0.83 |
| 40 | 2015 | | Cepeda | rice | >3/week | wheeze | OR | NO | 0.59 | 0.37 | 0.92 |
| 40 | 2015 | | Cepeda | fast food | 1-2/week | wheeze | OR | NO | 1.12 | 0.89 | 1.41 |
| 40 | 2015 | | Cepeda | fast food | >3/week | wheeze | OR | NO | 1.76 | 1.32 | 2.35 |
| 41 | 2015 | Gomes de Luna Mde | | fruit | >3/week | asthma | OR | NO | 0.74 | 0.52 | 1.06 | type of school; maternal education level; traffic of trucks/bus; rhinitis; rhinoconjunctivitis; physical activity; previous use of paracetamol; consumption of meat, fruits, vegetables, fast food, fried snacks, soft drinks, stuffed biscuits. |
| 41 | 2015 | Gomes de Luna Mde | | fruit | >3/week | asthma | OR | YES | 0.58 | 0.34 | 0.99 |
| 41 | 2015 | Gomes de Luna Mde | | fast food | >3/week | asthma | OR | YES | 1.97 | 1.13 | 3.42 |
| 41 | 2015 | Gomes de Luna Mde | | meat | >3/week | asthma | OR | YES | 0.92 | 0.51 | 1.68 |
| 41 | 2015 | Gomes de Luna Mde | | vegetables | >3/week | asthma | OR | YES | 1.51 | 0.76 | 2.99 |
| 41 | 2015 | Gomes de Luna Mde | | fast food | >3/week | asthma | OR | NO | 1.64 | 1.13 | 2.38 | NA |
| 41 | 2015 | Gomes de Luna Mde | | meat | >3/week | asthma | OR | NO | 1.27 | 0.89 | 1.81 |
| 41 | 2015 | Gomes de Luna Mde | | vegetables | >3/week | asthma | OR | NO | 1.68 | 1.09 | 2.58 |

| 42 | 2015 | Han | fruit | high | asthma | OR | YES | 0.8 | 0.48 | 1.34 | age, sex, household income, parental asthma, body mass index, outdoor physical activity, early-life environmental tobacco smoke, and breastfeeding |
| --- | --- | --- | --- | --- | --- | --- | --- | --- | --- | --- | --- |
| 42 | 2015 | Han | vegetables | high | asthma | OR | YES | 0.56 | 0.34 | 0.95 |
| 42 | 2015 | Han | cereals | high | asthma | OR | YES | 0.4 | 0.23 | 0.67 |
| 42 | 2015 | Han | milk | high | asthma | OR | YES | 1.93 | 1.32 | 2.84 |
| 42 | 2015 | Han | fast food | high | asthma | OR | YES | 1.72 | 1.08 | 2.72 |
| 43 | 2015 | Lumia | milk | NA | asthma | RR | NO | 0.95 | 0.9 | 1.01 | gestational age, maternal age, maternal smoking during pregnancy, duration of breastfeeding, number of siblings parental asthma or allergic rhinitis, birth weight, mode of delivery, maternal vocational education, dogs at home during the first year of life, CMA and age at introduction of solid foods |
| 43 | 2015 | Lumia | cereals | NA | asthma | RR | NO | 0.88 | 0.77 | 1.02 |
| 43 | 2015 | Lumia | meat | NA | asthma | RR | NO | 0.95 | 0.84 | 1.08 |
| 43 | 2015 | Lumia | fish | NA | asthma | RR | NO | 0.87 | 0.77 | 0.98 |
| 43 | 2015 | Lumia | eggs | NA | asthma | RR | NO | 1.08 | 0.89 | 1.31 |
| 43 | 2015 | Lumia | butter | NA | asthma | RR | NO | 0.89 | 0.72 | 1.1 |
| 43 | 2015 | Lumia | vegetables | NA | asthma | RR | NO | 1.1 | 0.98 | 1.23 |
| 43 | 2015 | Lumia | milk | NA | asthma | RR | NO | 0.93 | 0.88 | 0.98 | NA |
| 43 | 2015 | Lumia | cereals | NA | asthma | RR | NO | 0.74 | 0.64 | 0.84 |
| 43 | 2015 | Lumia | meat | NA | asthma | RR | NO | 0.96 | 0.85 | 1.08 |
| 43 | 2015 | Lumia | fish | NA | asthma | RR | NO | 0.82 | 0.73 | 0.92 |
| 43 | 2015 | Lumia | eggs | NA | asthma | RR | NO | 0.88 | 0.77 | 1.02 |
| 43 | 2015 | Lumia | butter | NA | asthma | RR | NO | 0.83 | 0.68 | 1.01 |
| 43 | 2015 | Lumia | vegetables | NA | asthma | RR | NO | 1.11 | 1.01 | 1.22 |
| 44 | 2015 | Papadopoulou | antioxidants | NA | asthma | OR | YES | 0.87 | 0.77 | 0.99 | city of origin and exercise level, parental allergy history and breast feeding, parental academic education, environmental indoor and outdoor factors |
| 45 | 2015 | Rice | mediterranean diet | NA | asthma | OR | NO | 0.56 | 0.36 | 0.9 | NA |
| 45 | 2015 | Rice | mediterranean diet | NA | asthma | OR | YES | 0.55 | 0.33 | 0.92 | age, sex, BMI category, and maternal education as an indicator of SES |
| 46 | 2015 | Saadeh | vegetables | high | asthma | OR | YES | 1.11 | 0.87 | 1.4 | gender, place of residence, parental atopic disease, number of siblings, maternal education, parental ethnic origins breastfeeding, day care center or nursery, overweight and obesity and current exposure to environmental tobacco smoke (ETS) |
| 46 | 2015 | Saadeh | fruit | high | asthma | OR | YES | 0.99 | 0.77 | 1.29 |  |
| 46 | 2015 | Saadeh | red meat | high | asthma | OR | YES | 0.93 | 0.75 | 1.16 |
| 46 | 2015 | Saadeh | fish | high | asthma | OR | YES | 1.22 | 0.65 | 2.26 |
| 46 | 2015 | Saadeh | fast food | high | asthma | OR | YES | 1.47 | 0.17 | 2.18 |
| 46 | 2015 | Saadeh | vegetables | high | wheeze | OR | YES | 0.95 | 0.62 | 1.4 |
| 46 | 2015 | Saadeh | fruit | high | wheeze | OR | YES | 0.89 | 0.67 | 1.18 |
| 46 | 2015 | Saadeh | red meat | high | wheeze | OR | YES | 1.07 | 0.76 | 1.55 |
| 46 | 2015 | Saadeh | fish | high | wheeze | OR | YES | 0.61 | 0.43 | 0.87 |
| 46 | 2015 | Saadeh | fast food | high | wheeze | OR | YES | 2.39 | 1.47 | 3.93 |
| 46 | 2015 | Saadeh | butter | high | wheeze | OR | YES | 1.51 | 1.17 | 2 |
| 47 | 2016 | Alqahtani | seafood | NA | asthma | OR | YES | 0.39 | 0.17 | 0.88 | other studied personal, environmental, and dietary factors and allergens |
| 47 | 2016 | Alqahtani | fruit | NA | asthma | OR | YES | 0.72 | 0.54 | 0.96 |
| 47 | 2016 | Alqahtani | vegetables | NA | asthma | OR | YES | 1.58 | 1.18 | 2.11 |
| 47 | 2016 | Alqahtani | nuts | NA | asthma | OR | YES | 0.71 | 0.48 | 1.03 |
| 47 | 2016 | Alqahtani | dairy products | NA | asthma | OR | YES | 0.53 | 0.4 | 0.71 |
| 47 | 2016 | Alqahtani | eggs | NA | asthma | OR | YES | 1.47 | 1.11 | 1.95 |
| 47 | 2016 | Alqahtani | fast food | NA | asthma | OR | YES | 0.92 | 0.64 | 1.33 |
| 47 | 2016 | Alqahtani | meat | NA | asthma | OR | YES | 0.85 | 0.65 | 1.1 |
| 47 | 2016 | Alqahtani | seafood | NA | asthma | OR | NO | 0.37 | 0.17 | 0.79 | NA |
| 47 | 2016 | Alqahtani | fruit | NA | asthma | OR | NO | 0.84 | 0.68 | 1.05 |
| 47 | 2016 | Alqahtani | vegetables | NA | asthma | OR | NO | 1.1 | 0.88 | 1.36 |
| 47 | 2016 | Alqahtani | nuts | NA | asthma | OR | NO | 0.87 | 0.65 | 1.14 |
| 47 | 2016 | Alqahtani | dairy products | NA | asthma | OR | NO | 0.77 | 0.62 | 0.96 |
| 47 | 2016 | Alqahtani | eggs | NA | asthma | OR | NO | 1.46 | 1.17 | 1.84 |
| 47 | 2016 | Alqahtani | fast food | NA | asthma | OR | NO | 1.01 | 0.74 | 1.37 |
| 47 | 2016 | Alqahtani | meat | NA | asthma | OR | NO | 0.97 | 0.78 | 1.21 |
| 48 | 2016 | Feng | meat | >3/week | asthma | OR | NO | 2.11 | 1.13 | 3.94 | NA |
| 48 | 2016 | Feng | meat | >3/week | asthma | OR | YES | 2.37 | 1.32 | 4.32 | age, gender and region |
| 49 | 2016 | Mascarenhas | healthy | NA | asthma | OR | YES | 0.61 | 0.37 | 0.99 | sex, rhinitis, eczema, age, tertile for standards 1, 2, and 3, income and education level of the head of family |
| 50 | 2017 | Hallit | red meat | high | asthma | OR | YES | 2.117 | 1.07 | 4.18 | Educational level of the father, educational level of the mother, age category, gender, district. |
| 50 | 2017 | Hallit | nuts | high | asthma | OR | YES | 1.096 | 0.52 | 2.3 |
| 50 | 2017 | Hallit | dairy products | high | asthma | OR | YES | 0.142 | 0.05 | 0.38 |
| 51 | 2018 | Kang | fruit | NA | asthma | OR | YES | 0.91 | 0.79 | 1.05 | demographic factors (sex and age) |
| 51 | 2018 | Kang | vegetables | NA | asthma | OR | YES | 0.96 | 0.86 | 1.07 |
| 51 | 2018 | Kang | milk | NA | asthma | OR | YES | 1.01 | 0.89 | 1.12 |
| 51 | 2018 | Kang | fast food | NA | asthma | OR | YES | 2.05 | 1.54 | 2.75 |
| 52 | 2018 | Melo | meat | high | asthma | OR | YES | 1.29 | 1.2 | 1.4 | sex, age, mother’s education level, parents as smokers, having smoked in the past 30 days, alcohol consumption in the past 30 days, school type, geographical region and municipality of residence |
| 52 | 2018 | Melo | fast food | high | asthma | OR | YES | 1.28 | 1.2 | 1.35 |
| 52 | 2018 | Melo | meat | high | wheeze | OR | YES | 1.29 | 1.14 | 1.47 |
| 52 | 2018 | Melo | fast food | high | wheeze | OR | YES | 1.24 | 1.2 | 1.29 |
| 52 | 2018 | Melo | meat | high | asthma | OR | NO | 1.36 | 1.26 | 1.47 | NA |
| 52 | 2018 | Melo | fast food | high | asthma | OR | NO | 1.35 | 1.26 | 1.46 |
| 52 | 2018 | Melo | meat | high | wheeze | OR | NO | 1.38 | 1.22 | 1.55 |
| 52 | 2018 | Melo | fast food | high | wheeze | OR | NO | 1.34 | 1.28 | 1.4 |
| 53 | 2019 | Elias | fast food | high | asthma | OR | NO | 1.33 | 1.28 | 1.37 | NA |
| 53 | 2019 | Elias | fast food | high | asthma | OR | YES | 1.13 | 1.08 | 1.16 | being a female, age under 14 years, not living with parents, larger number of days of consumption of ultra-processed foods, having lunch or dinner without the presence of parents or guardians, eating meals in front of the TV or while studying, frequently not having breakfast, smoking cigarettes, drinking alcohol, use of illicit drugs, and search for health care in the last year. |
| 54 | 2019 | Malaeb | mediterranean diet | occasional | asthma | OR | YES | 0.23 | 0.09 | 0.96 | NA |
| 54 | 2019 | Malaeb | mediterranean diet | daily | asthma | OR | YES | 0.222 | 0.08 | 0.67 |
| 54 | 2019 | Malaeb | meat | occasional | asthma | OR | YES | 5.13 | 1.98 | 12.3 |
| 54 | 2019 | Malaeb | meat | daily | asthma | OR | YES | 4.53 | 1.62 | 9.61 |
| 54 | 2019 | Malaeb | dairy products | daily | asthma | OR | YES | 9.57 | 3.81 | 18.6 |
| 55 | 2019 | Øien | fish | NA | asthma | RR | YES | 0.6 | 0.39 | 0.91 | family history of atopy, presence of older siblings, parental smoking within during pregnancy and the first year of life maternal age, average income of postal code area and interventional cohort |
| 55 | 2019 | Øien | fish | NA | wheeze | RR | YES | 0.66 | 0.5 | 0.88 |
| 56 | 2020 | Lawrence | meat | high | asthma | OR | YES | 2.09 | 1.05 | 4.16 | age, sex, socioeconomic characteristics, family history of allergy, and select home exposures |
| 57 | 2020 | Nkosi | fast food | 1-2/week | wheeze | OR | NO | 1.04 | 0.85 | 1.27 | NA |
| 57 | 2020 | Nkosi | fast food | >3/week | wheeze | OR | NO | 1.5 | 1.22 | 1.86 |
| 57 | 2020 | Nkosi | fast food | 1-2/week | asthma | OR | NO | 1.05 | 0.81 | 1.37 |
| 57 | 2020 | Nkosi | fast food | >3/week | asthma | OR | NO | 1.35 | 1.02 | 1.79 |
| 57 | 2020 | Nkosi | fast food | 1-2/week | wheeze | OR | YES | 1.09 | 0.87 | 1.37 | active smoking by participants (yes/no), ETS exposure at home (yes/no), type of residential cooking/heating fuel (electricity, gas, paraffin, wood/coal), the frequency of trucks passing near the residence (never, seldom, frequently through the day , almost all day), sex (female/male), vigorous physical activities (never/occasionally , 1–2 times/week) and type of house (brick, mud, corrugated iron, or combination) |
| 57 | 2020 | Nkosi | fast food | >3/week | wheeze | OR | YES | 1.6 | 1.26 | 2.03 |
| 57 | 2020 | Nkosi | fast food | 1-2/week | asthma | OR | YES | 1.05 | 0.81 | 1.37 |
| 57 | 2020 | Nkosi | fast food | >3/week | asthma | OR | YES | 1.37 | 1.04 | 1.91 |
| 58 | 2020 | Reis | fast food | high | asthma | OR | YES | 1.89 | 1.08 | 3.21 | gender, age, race, weight status, parent’s education, English language proficiency of parent, household income, and location of residence |
| 58 | 2020 | Reis | fast food | high | asthma | OR | YES | 1.21 | 1.02 | 1.45 |
| 59 | 2020 | Tarazona-Meza | healthy | high | asthma | OR | YES | 0.83 | 0.72 | 0.95 | age, sex, BMI, SES and site of residence |
| 60 | 2021 | Molnár | fast food | high | asthma | OR | YES | 1.75 | 1.39 | 2.19 | NA |
| 60 | 2021 | Molnár | margarine | high | asthma | OR | YES | 1.35 | 1.11 | 1.65 |
| 60 | 2021 | Molnár | cereals | high | asthma | OR | YES | 0.54 | 0.41 | 0.73 |
| 61 | 2021 | Antonogeorgos | vegetables | high | asthma | OR | NO | 0.57 | 0.35 | 0.93 | NA |
| 61 | 2021 | Antonogeorgos | dairy products | high | asthma | OR | NO | 0.57 | 0.39 | 0.81 | NA |
| 61 | 2021 | Antonogeorgos | vegetables | high | asthma | OR | YES | 0.59 | 0.36 | 0.96 | sex, obesity status, parental atopic history, pet ownership, parental smoking, having an older sibling, cooking with fuels |
| 61 | 2021 | Antonogeorgos | dairy products | high | asthma | OR | YES | 0.59 | 0.41 | 0.85 |
| 61 | 2021 | Antonogeorgos | fruit | high | asthma | OR | YES | 0.66 | 0.45 | 0.96 |
| 62 | 2021 | Mendes | vegetables | high | asthma | OR | YES | 0.67 | 0.47 | 0.95 | age, sex, atopy, body mass categories, parental education, maternal smoking during pregnancy, school, and PM2.5 and PM10 |
| 62 | 2021 | Mendes | fruit | high | asthma | OR | YES | 1.6 | 0.62 | 4.17 |
| 62 | 2021 | Mendes | vegetables | high | wheeze | OR | YES | 0.95 | 0.69 | 1.3 |
| 62 | 2021 | Mendes | fruit | high | wheeze | OR | YES | 0.98 | 0.58 | 1.66 |
| 63 | 2021 | Wang | meat | high | wheeze | OR | YES | 2.23 | 1.1 | 4.54 | age, sex, race/ethnicity, poverty to income ratio, body mass index (BMI) percentile, asthma status, total Healthy Eating Index (HEI) score and total caloric intake. |

***Abbreviations:*** NA: not available; ETS: environmental tobacco smoke; BMI: body mass index; HEI: Healthy Eating Index.

**Table S5.** **AHRQ for assessing the quality of all cross-sectional studies involved in this meta-analysis.**

| **year** | **first_author** | **Ⅰ** | **Ⅱ** | **Ⅲ** | **Ⅳ** | **Ⅴ** | **Ⅵ** | **Ⅶ** | **Ⅷ** | **Ⅸ** | **Ⅹ** | **Ⅺ** | **Total** |
| --- | --- | --- | --- | --- | --- | --- | --- | --- | --- | --- | --- | --- | --- |
| 1996 | Carey | 1 | 1 | 1 | 0 | 1 | 0 | 1 | 1 | 0 | 1 | 0 | 7 |
| 1996 | Hodge | 1 | 1 | 1 | 0 | 1 | 0 | 1 | 1 | 0 | 1 | 0 | 7 |
| 2000 | Forastiere | 1 | 1 | 1 | 0 | 1 | 1 | 0 | 1 | 0 | 1 | 1 | 8 |
| 2000 | Hijazi | 1 | 1 | 1 | 0 | 1 | 0 | 0 | 1 | 0 | 0 | 0 | 5 |
| 2001 | Huang | 1 | 1 | 1 | 0 | 1 | 0 | 0 | 1 | 0 | 1 | 0 | 6 |
| 2002 | Takemura | 1 | 1 | 1 | 1 | 1 | 0 | 1 | 1 | 0 | 1 | 0 | 8 |
| 2004 | Demir | 1 | 1 | 1 | 0 | 1 | 0 | 1 | 1 | 0 | 1 | 0 | 7 |
| 2004 | Wong | 1 | 1 | 1 | 0 | 1 | 0 | 0 | 1 | 0 | 1 | 0 | 6 |
| 2005 | Kim | 1 | 1 | 1 | 1 | 1 | 0 | 0 | 1 | 0 | 1 | 0 | 7 |
| 2005 | Lewis | 1 | 1 | 1 | 1 | 1 | 0 | 0 | 1 | 0 | 1 | 0 | 7 |
| 2005 | Njå | 1 | 1 | 1 | 1 | 1 | 1 | 0 | 1 | 0 | 0 | 0 | 7 |
| 2005 | Wickens | 1 | 1 | 1 | 1 | 1 | 0 | 0 | 1 | 0 | 1 | 0 | 7 |
| 2006 | Hong | 1 | 1 | 1 | 1 | 1 | 0 | 1 | 1 | 0 | 1 | 0 | 8 |
| 2006 | Pastorino | 1 | 1 | 1 | 1 | 1 | 0 | 1 | 1 | 1 | 0 | 0 | 8 |
| 2006 | Tabak | 1 | 1 | 1 | 1 | 1 | 0 | 1 | 1 | 0 | 1 | 0 | 8 |
| 2007 | Chatzi | 1 | 1 | 1 | 0 | 1 | 0 | 1 | 1 | 0 | 1 | 0 | 7 |
| 2007 | Garcia-Marcos | 1 | 1 | 1 | 1 | 1 | 0 | 1 | 1 | 0 | 1 | 1 | 9 |
| 2007 | Okoko | 1 | 1 | 1 | 1 | 1 | 0 | 1 | 1 | 0 | 1 | 0 | 8 |
| 2007 | Tsai | 1 | 1 | 1 | 1 | 1 | 0 | 0 | 1 | 0 | 1 | 0 | 7 |
| 2007 | Waser | 1 | 1 | 1 | 1 | 1 | 0 | 1 | 1 | 0 | 1 | 0 | 8 |
| 2008 | Corbo | 1 | 1 | 1 | 1 | 1 | 0 | 1 | 1 | 0 | 1 | 0 | 8 |
| 2008 | de Batlle | 1 | 1 | 1 | 1 | 1 | 0 | 1 | 1 | 0 | 1 | 0 | 8 |
| 2008 | Foliaki | 1 | 1 | 1 | 1 | 1 | 0 | 0 | 1 | 0 | 0 | 0 | 6 |
| 2008 | Garcia | 1 | 1 | 0 | 1 | 1 | 0 | 0 | 1 | 0 | 1 | 0 | 6 |
| 2009 | Gutiérrez-Delgado | 1 | 1 | 1 | 1 | 1 | 0 | 1 | 1 | 0 | 1 | 0 | 8 |
| 2009 | Mai | 1 | 1 | 1 | 0 | 1 | 0 | 0 | 1 | 0 | 0 | 0 | 5 |
| 2010 | Gonzalez Barcala | 1 | 1 | 1 | 1 | 1 | 0 | 0 | 1 | 0 | 1 | 0 | 7 |
| 2010 | Rodríguez-Rodríguez | 1 | 1 | 1 | 0 | 1 | 0 | 0 | 1 | 0 | 1 | 0 | 6 |
| 2011 | Fotini Arvaniti | 1 | 1 | 1 | 1 | 1 | 0 | 0 | 1 | 0 | 1 | 0 | 7 |
| 2011 | Arvaniti | 1 | 1 | 1 | 1 | 1 | 0 | 0 | 1 | 0 | 1 | 0 | 7 |
| 2013 | Lawson | 1 | 1 | 1 | 0 | 1 | 0 | 0 | 1 | 0 | 1 | 0 | 6 |
| 2014 | Akcay | 1 | 1 | 1 | 1 | 1 | 0 | 0 | 1 | 0 | 1 | 0 | 7 |
| 2014 | D'Innocenzo | 1 | 1 | 1 | 1 | 1 | 0 | 0 | 1 | 0 | 0 | 0 | 6 |
| 2014 | Patel | 1 | 1 | 1 | 1 | 1 | 0 | 0 | 1 | 0 | 1 | 0 | 7 |
| 2015 | Cepeda | 1 | 1 | 1 | 1 | 1 | 0 | 0 | 1 | 0 | 1 | 0 | 7 |
| 2015 | Gomes de Luna Mde | 1 | 1 | 1 | 1 | 1 | 0 | 0 | 1 | 0 | 1 | 0 | 7 |
| 2015 | Han | 1 | 1 | 1 | 0 | 1 | 0 | 1 | 1 | 0 | 0 | 0 | 6 |
| 2015 | Papadopoulou | 1 | 1 | 1 | 1 | 1 | 0 | 0 | 1 | 0 | 1 | 0 | 7 |
| 2015 | Rice | 1 | 1 | 1 | 0 | 1 | 0 | 0 | 1 | 0 | 1 | 0 | 6 |
| 2015 | Saadeh | 1 | 1 | 1 | 1 | 1 | 0 | 1 | 1 | 0 | 1 | 0 | 8 |
| 2016 | Alqahtani | 1 | 1 | 1 | 1 | 1 | 0 | 0 | 1 | 0 | 0 | 0 | 6 |
| 2016 | Feng | 1 | 1 | 1 | 1 | 1 | 0 | 0 | 1 | 0 | 1 | 0 | 7 |
| 2016 | Mascarenhas | 1 | 1 | 1 | 1 | 1 | 0 | 0 | 1 | 0 | 1 | 0 | 7 |
| 2017 | Hallit | 1 | 1 | 1 | 0 | 1 | 0 | 0 | 1 | 0 | 0 | 0 | 5 |
| 2018 | Kang | 1 | 1 | 1 | 0 | 1 | 0 | 0 | 1 | 0 | 0 | 0 | 5 |
| 2018 | Melo | 1 | 1 | 1 | 1 | 1 | 0 | 1 | 1 | 0 | 1 | 0 | 8 |
| 2019 | Elias | 1 | 1 | 1 | 1 | 1 | 0 | 1 | 1 | 0 | 1 | 0 | 8 |
| 2019 | Malaeb | 1 | 1 | 1 | 1 | 1 | 0 | 1 | 1 | 0 | 1 | 0 | 8 |
| 2020 | Lawrence | 1 | 1 | 1 | 0 | 1 | 0 | 1 | 1 | 0 | 1 | 0 | 7 |
| 2020 | Nkosi | 1 | 1 | 1 | 1 | 1 | 0 | 1 | 1 | 0 | 1 | 0 | 8 |
| 2020 | Reis | 1 | 1 | 1 | 1 | 1 | 0 | 1 | 1 | 0 | 1 | 0 | 8 |
| 2020 | Tarazona-Meza | 1 | 1 | 1 | 0 | 1 | 0 | 0 | 1 | 0 | 0 | 0 | 5 |
| 2021 | Molnár | 1 | 1 | 1 | 1 | 1 | 0 | 1 | 1 | 0 | 1 | 0 | 8 |
| 2021 | George Antonogeorgos | 1 | 1 | 1 | 1 | 1 | 0 | 1 | 1 | 0 | 1 | 0 | 8 |
| 2021 | Antonogeorgos | 1 | 1 | 1 | 1 | 1 | 0 | 1 | 1 | 0 | 1 | 0 | 8 |
| 2021 | Mendes | 1 | 1 | 1 | 1 | 1 | 0 | 1 | 1 | 0 | 1 | 0 | 8 |
| 2021 | Wang | 1 | 1 | 1 | 1 | 1 | 0 | 1 | 1 | 0 | 0 | 0 | 7 |

Notes: (Ⅰ) Define the source of information (survey, record review); (Ⅱ) List inclusion and exclusion criteria for exposed and unexposed subjects (cases and controls) or refer to previous publications; (Ⅲ) Indicate time period used for identifying patients; (Ⅳ) Indicate whether or not subjects were consecutive if not population-based; (Ⅴ) Indicate if evaluators of subjective components of study were masked to other aspects of the status of the participants; (Ⅵ) Describe any assessments undertaken for quality assurance purposes (e.g. test/retest of primary outcome measurements); (Ⅶ) Explain any patient exclusions from analysis; (Ⅷ) Describe how confounding was assessed and/or controlled; (Ⅸ) If applicable, explain how missing data were handled in the analysis; (Ⅹ) Summarize patient response rates and completeness of data collection; (Ⅺ) Clarify what follow-up, if any, was expected and the percentage of patients for which incomplete data or follow-up was obtained.

**Table S6.** **The Newcastle-Ottawa Scale (NOS) for assessing the quality of all cohort studies involved in this meta-analysis.**

| **First author** | **Published year** | **Representative of the exposed cohort** | **Selection of the non-exposed cohort** | **Ascertainment of exposed** | **Demonstration that outcome of interest was no present at start of study** | **Control for important cohort** | **Additional factors** | **Assessment of outcome** | **Follow up** | **Adequacy of follow up** | **Score** |
| --- | --- | --- | --- | --- | --- | --- | --- | --- | --- | --- | --- |
| Nafstad | 2003 | 1 | 1 | 1 | 1 | 1 | 1 | 1 | 1 | 0 | 8 |
| Wijga | 2003 | 1 | 1 | 1 | 1 | 1 | 1 | 1 | 0 | 1 | 8 |
| Goksör | 2011 | 1 | 1 | 1 | 1 | 1 | 0 | 1 | 1 | 1 | 8 |
| Willers | 2011 | 1 | 1 | 1 | 1 | 1 | 1 | 1 | 1 | 0 | 8 |
| Kiefte-de Jong | 2012 | 1 | 1 | 1 | 1 | 1 | 1 | 1 | 0 | 0 | 7 |
| Goksör | 2013 | 1 | 1 | 1 | 1 | 1 | 0 | 1 | 1 | 1 | 8 |
| Lumia | 2015 | 1 | 1 | 1 | 0 | 1 | 1 | 1 | 1 | 0 | 7 |
| Øien | 2019 | 1 | 1 | 1 | 1 | 1 | 1 | 1 | 1 | 1 | 9 |





**Figure S1. A.** Overall analysis of fruit with asthma in cross-sectional study. **B.** fruit with wheeze in cross-sectional study. **C.** vegetables with asthma in cross-sectional study. **D.** vegetables with wheeze in cross-sectional study. **E** dairy products with asthma in cross-sectional study. **F.** dairy products with wheeze in cross-sectional study. **G.** sea food with asthma in cross-sectional study. **H.** sea food with wheeze in cross-sectional study. **I.** cereals with asthma in cross-sectional study. **J.** cereals with wheeze in cross-sectional study. **K.** nuts with asthma in cross-sectional study. **L.** nuts with wheeze in cross-sectional study. **M.** protein foods with asthma in cross-sectional study. **N.** protein foods with wheeze in cross-sectional study. **O.** starchy foods with asthma in cross-sectional study. **P.** starchy foods with wheeze in cross-sectional study. **Q.** Mediterranean diet with asthma in cross-sectional study. **R.** fast food with asthma in cross-sectional study. **S.** fast food with wheeze in cross-sectional study. **T.** margarine with asthma in cross-sectional study. **U.** margarine with wheeze in cross-sectional study.
